# Supplementary material for: The first total synthesis of (+)-goniothalesacetate and syntheses of (+)-altholactone, (+)-gonioheptolide A, and (−)-goniofupyrone by an asymmetric acetate aldol approach
Source: Royal Society of Chemistry journal article supplement (doi:10.1039/c5ob01598g), 2015-01-01

*Supporting Information*

**First Total Synthesis of (+)-Goniothalesacetate and Syntheses of (+)-Altholactone, (+)-Gonioheptolide A, and (-)-Goniofupyrone by an Asymmetric Acetate Aldol approach**

Sandeep AnkiReddy, Praveen AnkiReddy and Gowravaram Sabitha\*

*Natural Products Chemistry Division, CSIR-Indian Institute of Chemical Technology,  
Hyderabad-500 007, India*

*Corresponding Author: E-mail: [gowravaramsr@yahoo.com](mailto:gowravaramsr@yahoo.com); [sabitha@iict.res.in](mailto:sabitha@iict.res.in);*

*Fax: +91-40-27160512*

Copies of  $^1\text{H}$  and  $^{13}\text{C}$  spectra for all compounds

2- 21

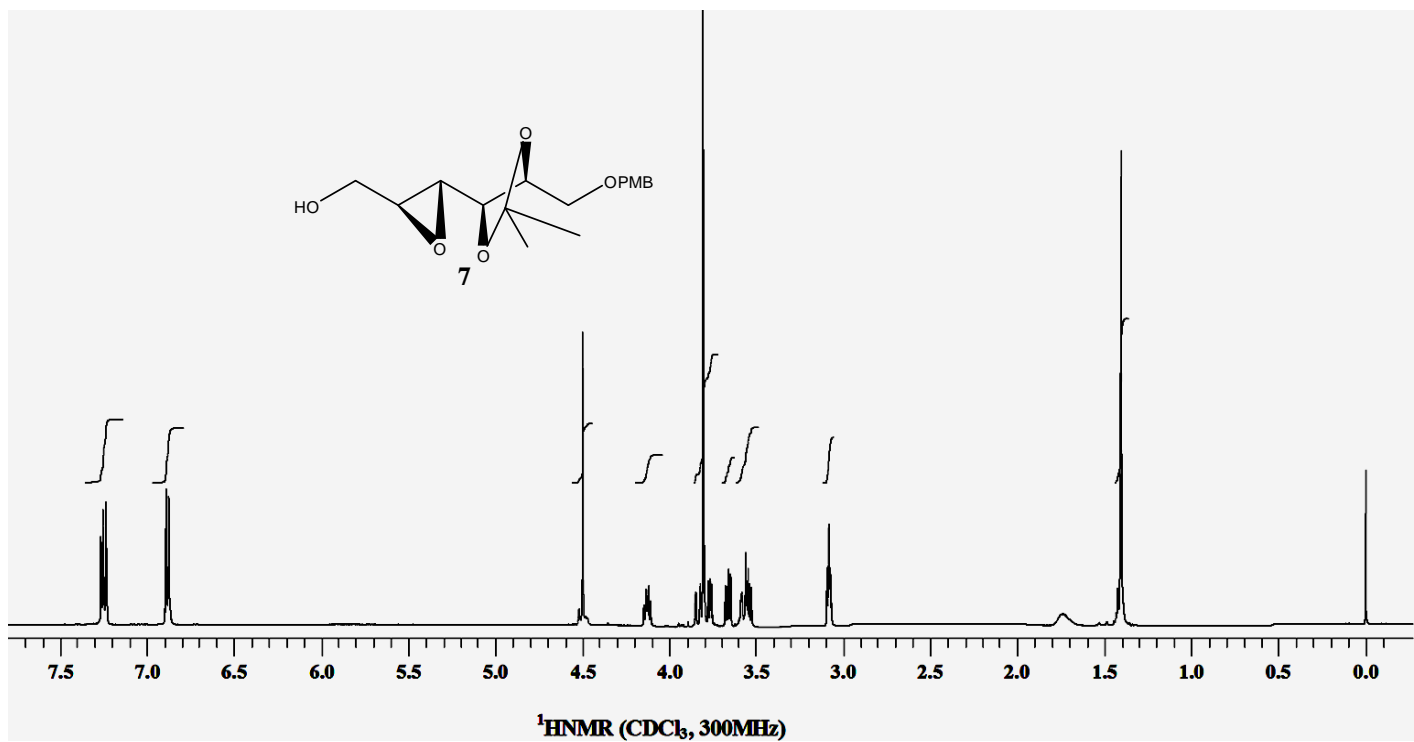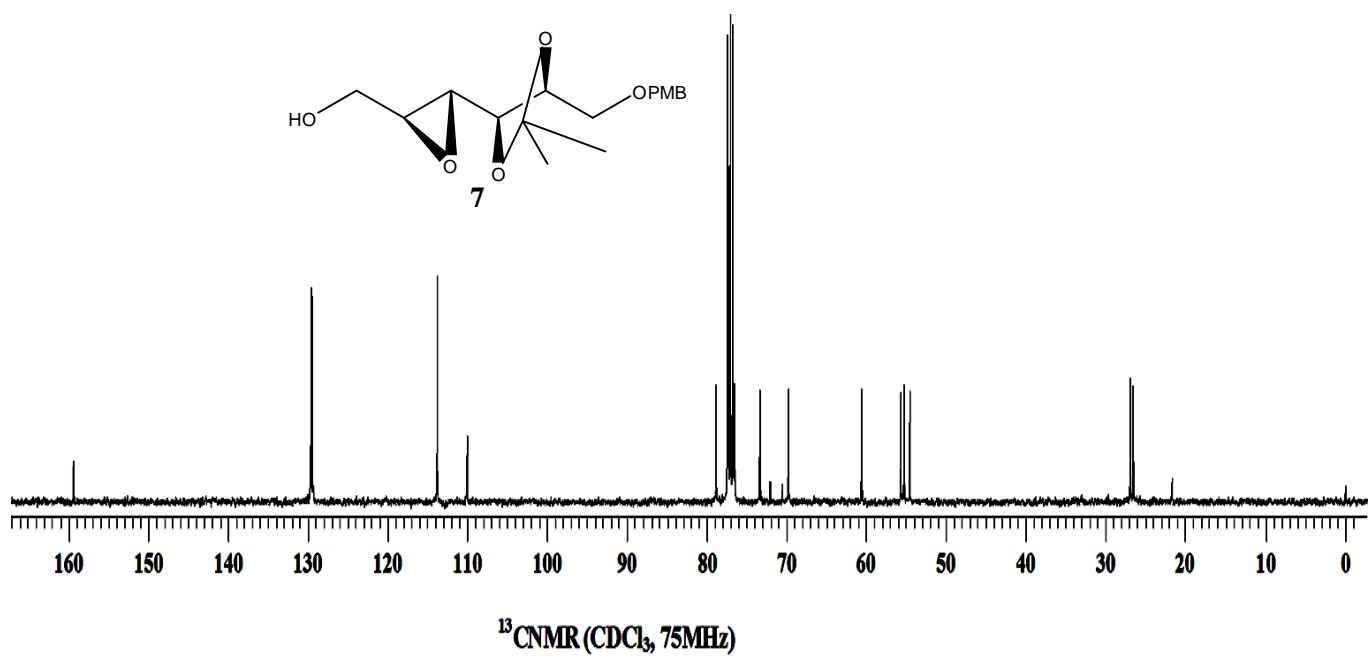

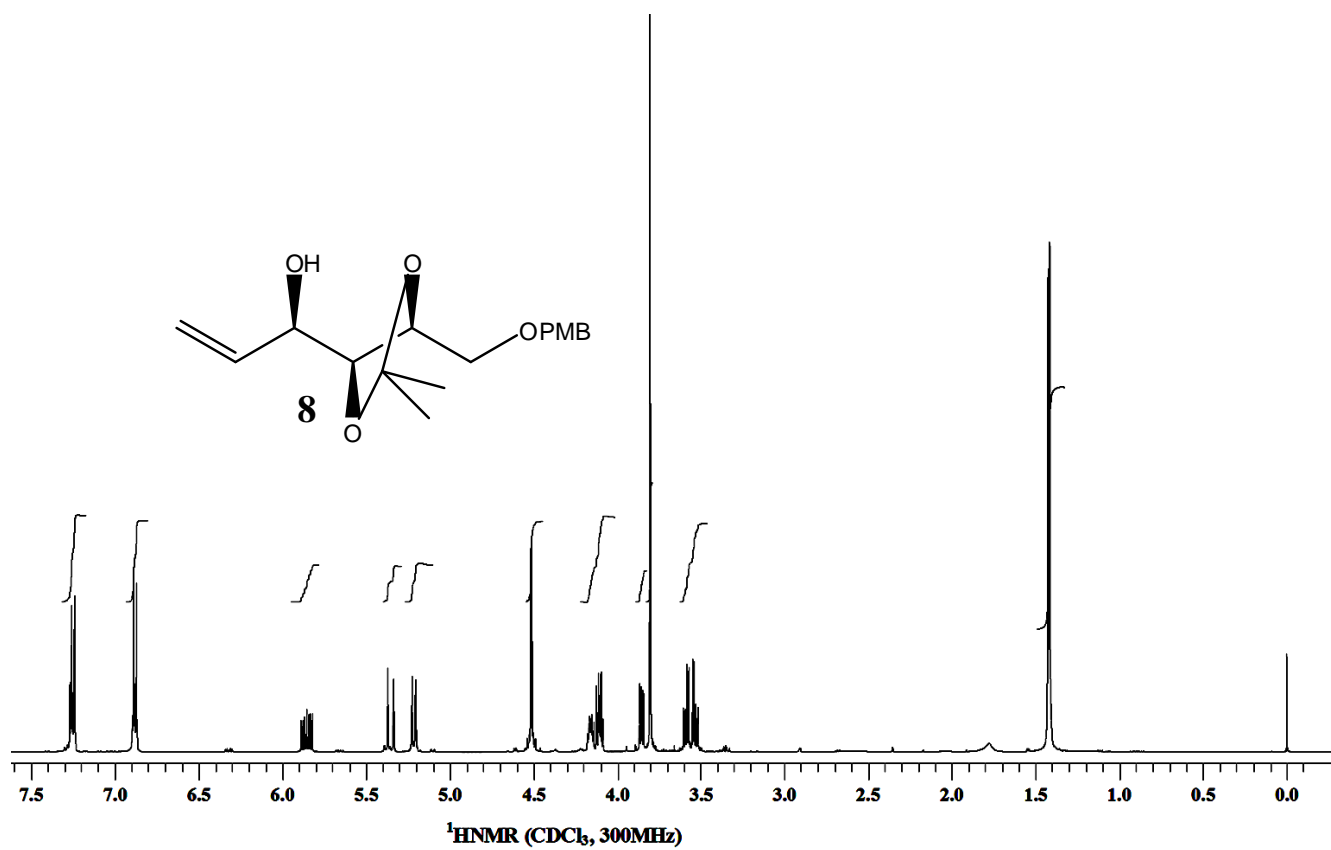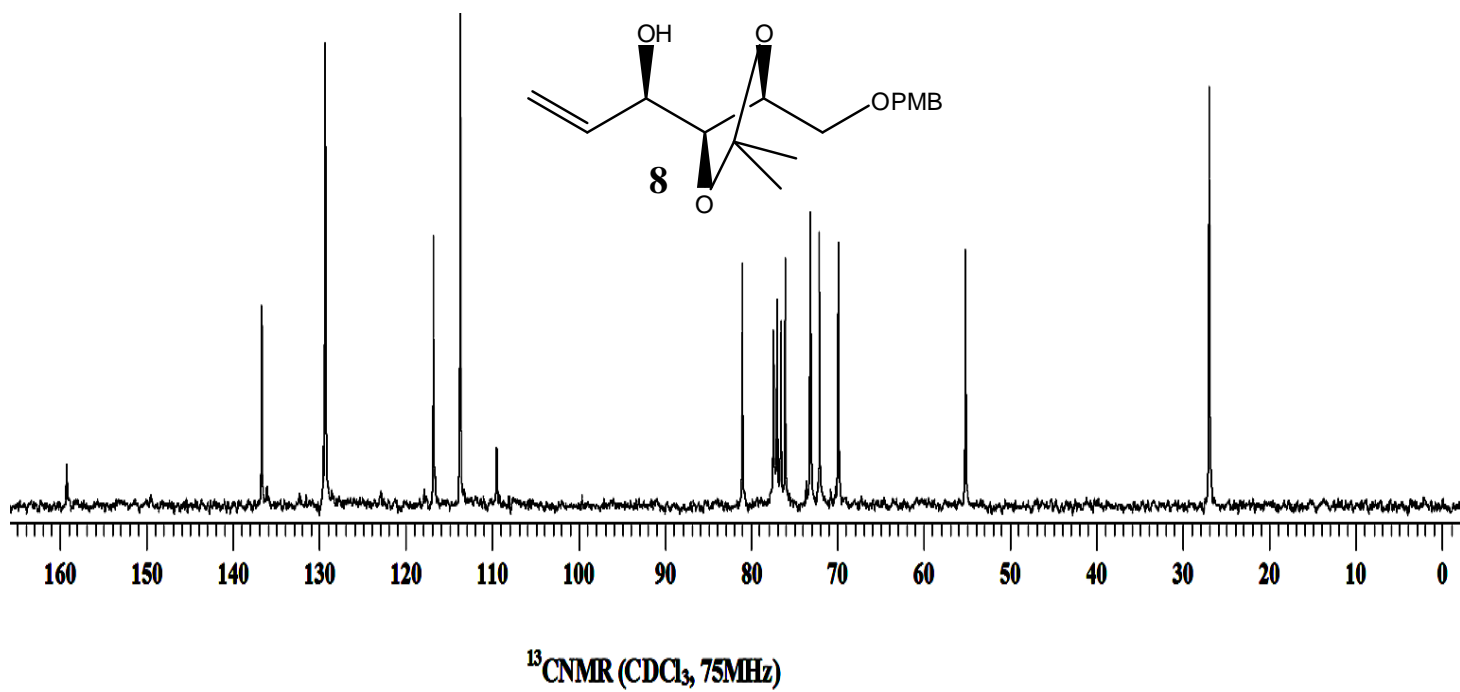

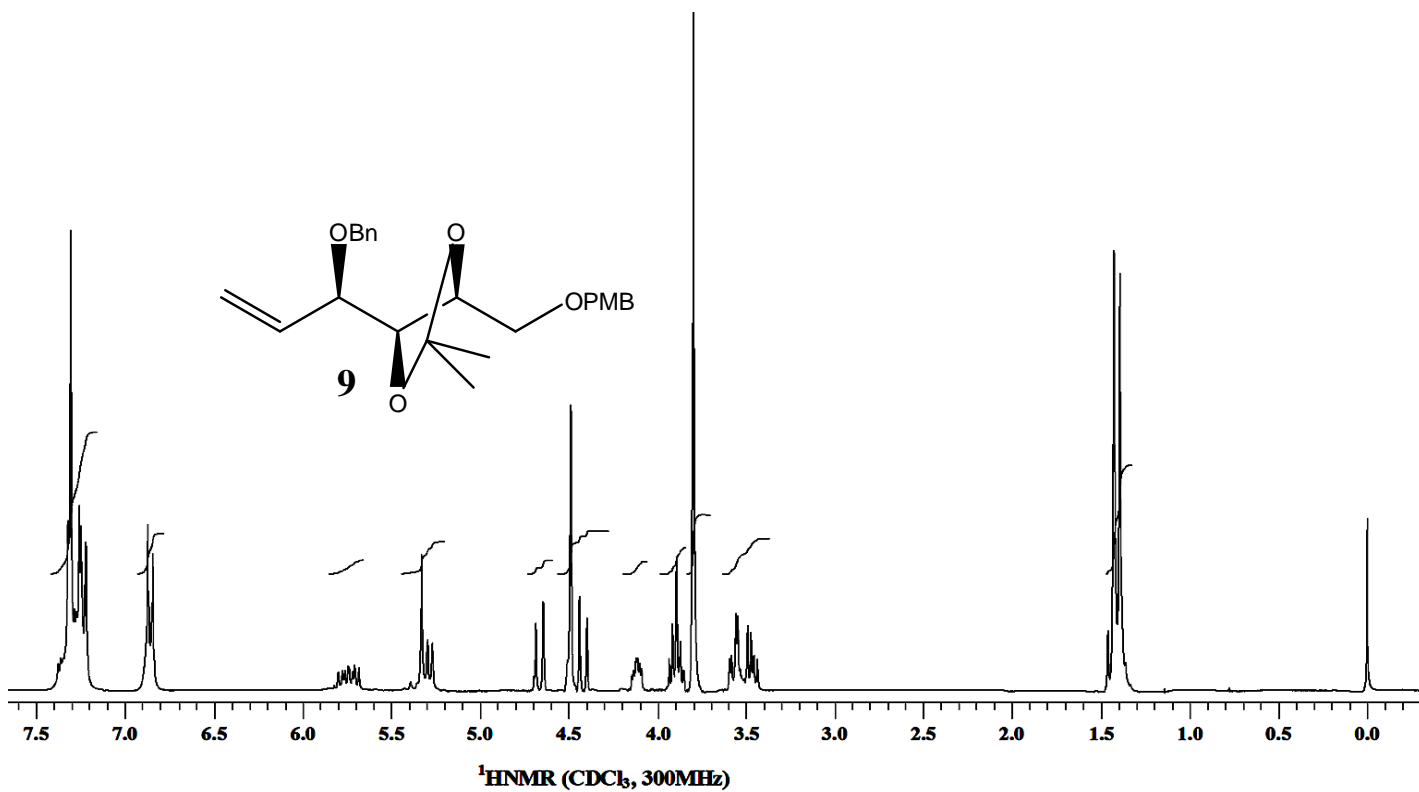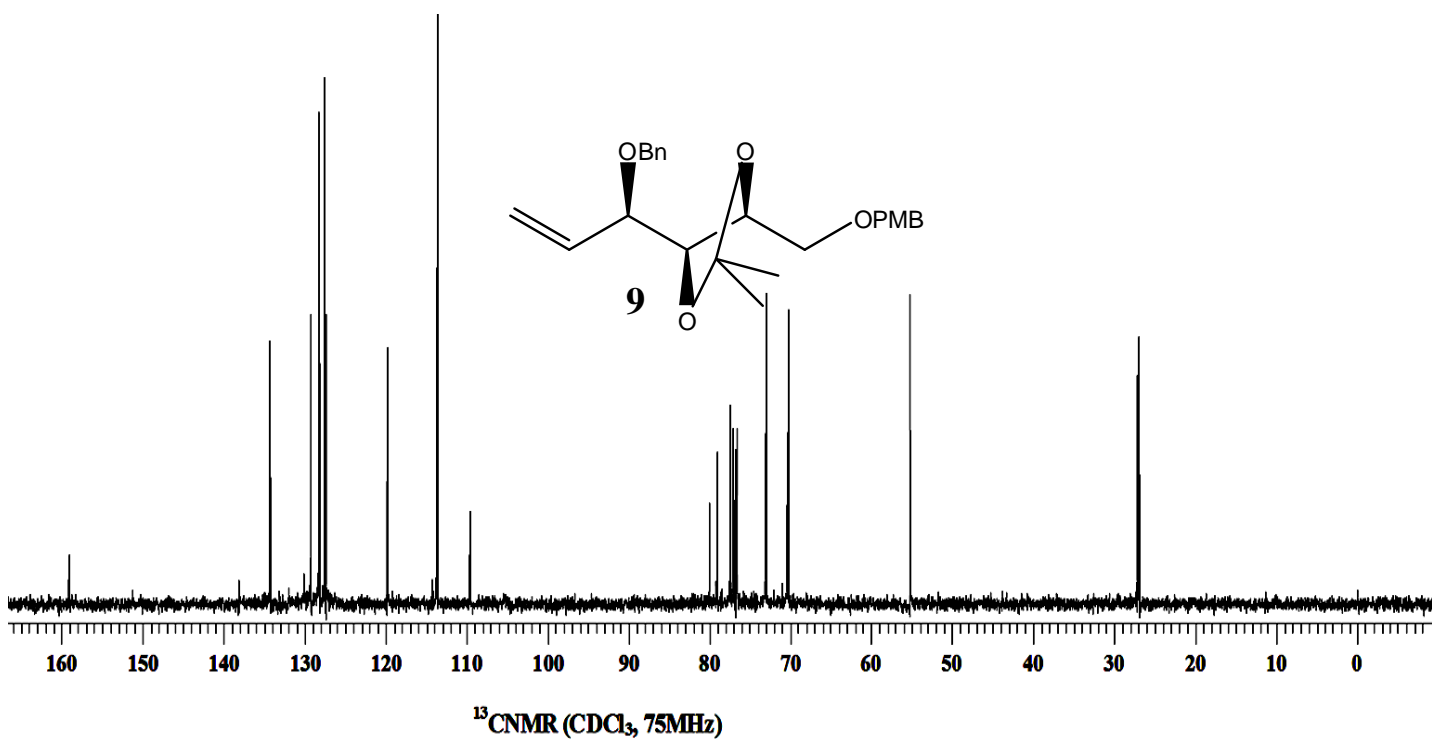

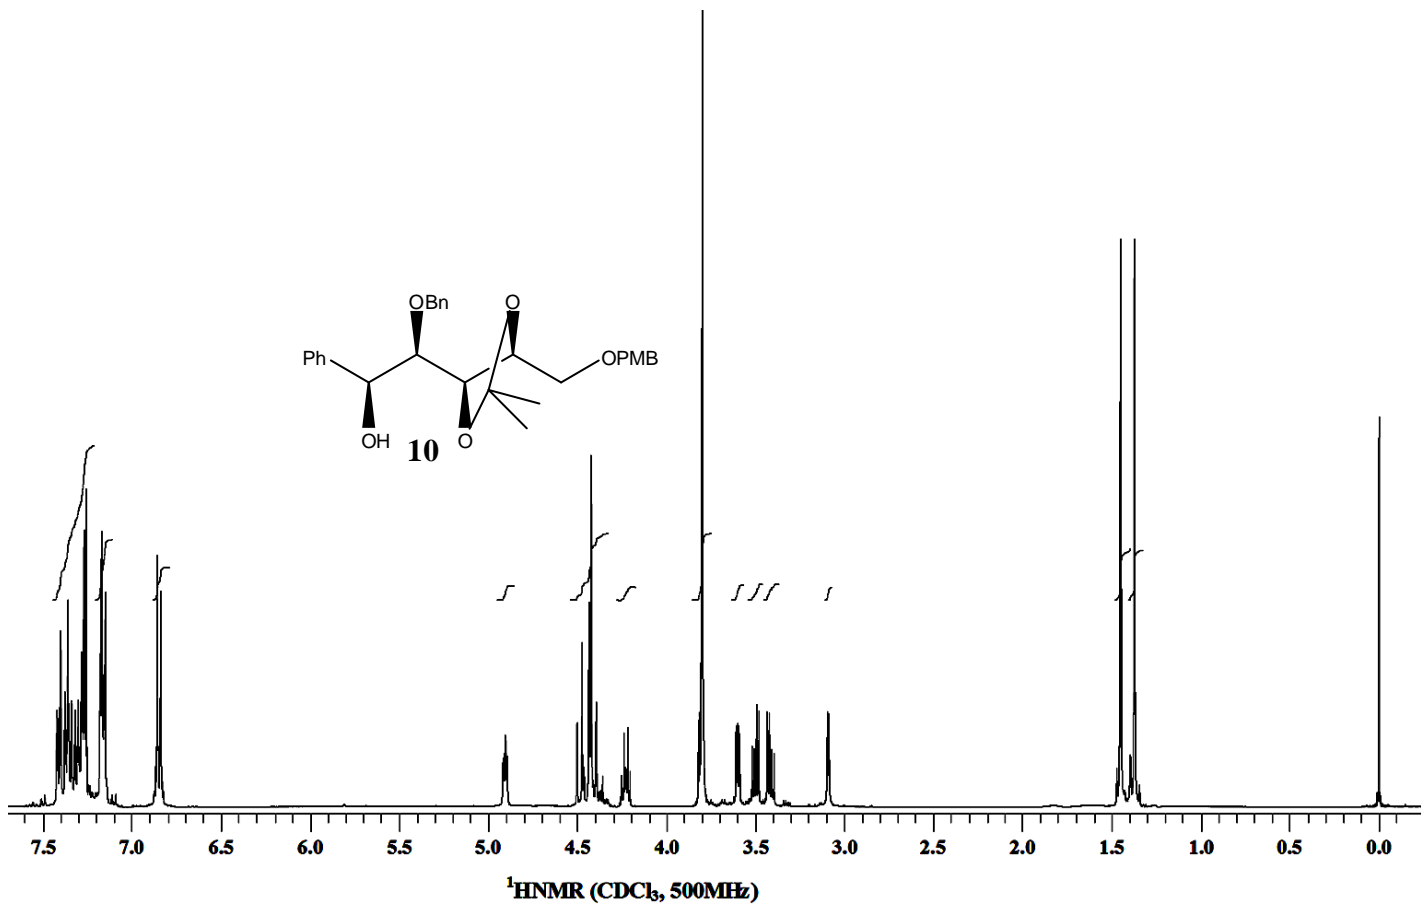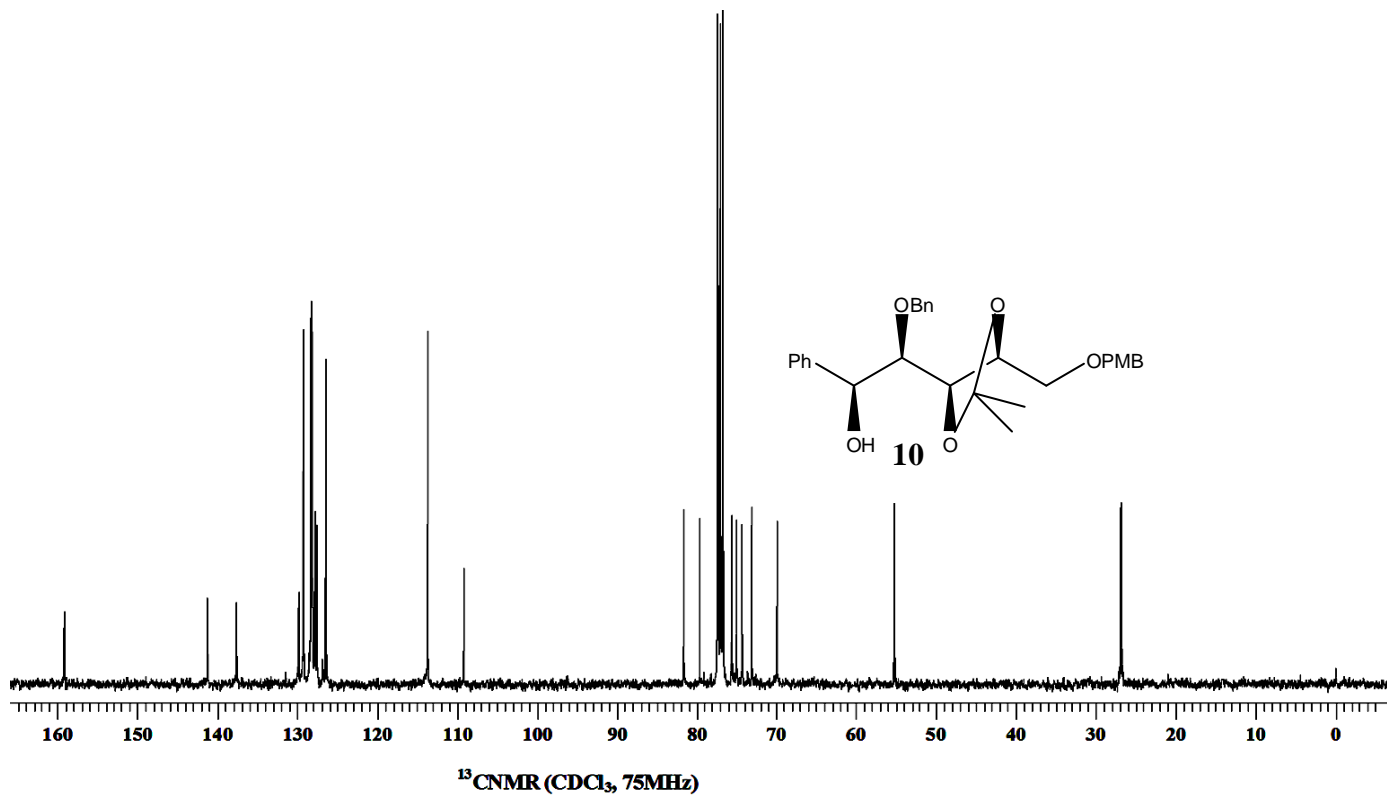

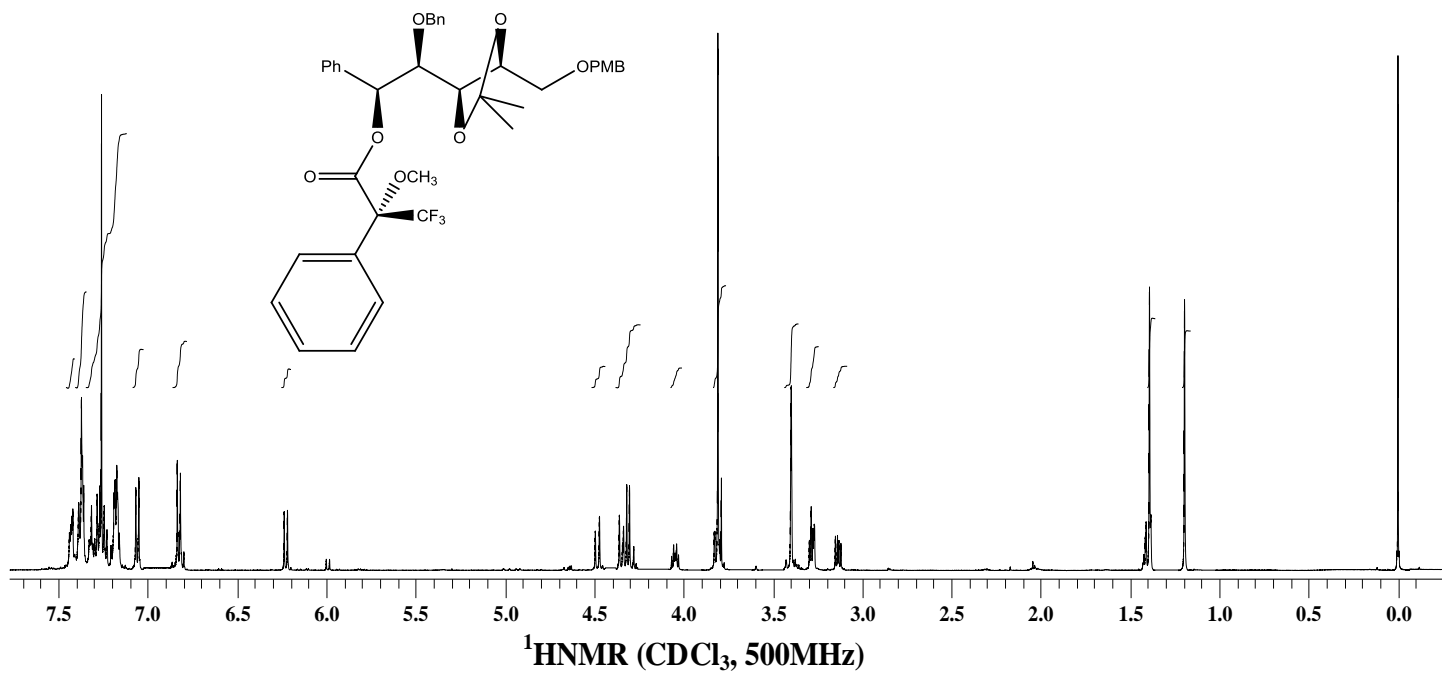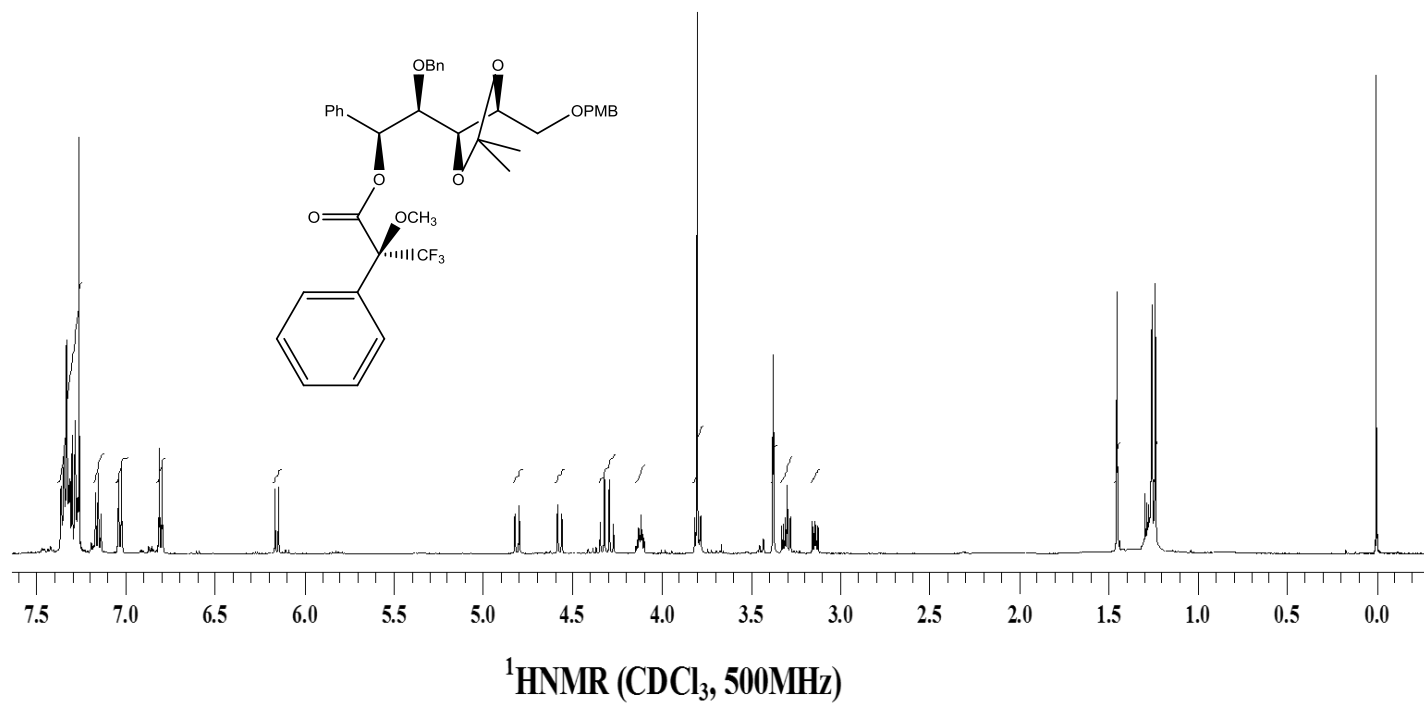

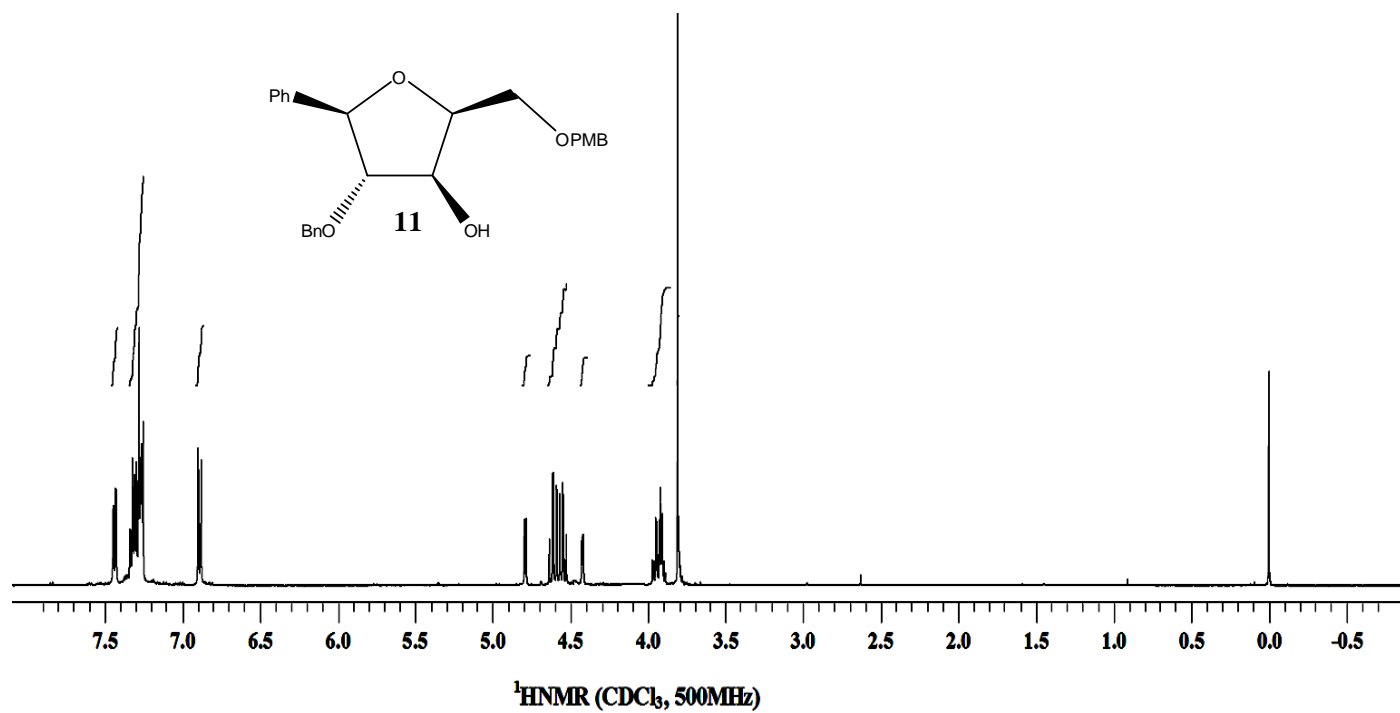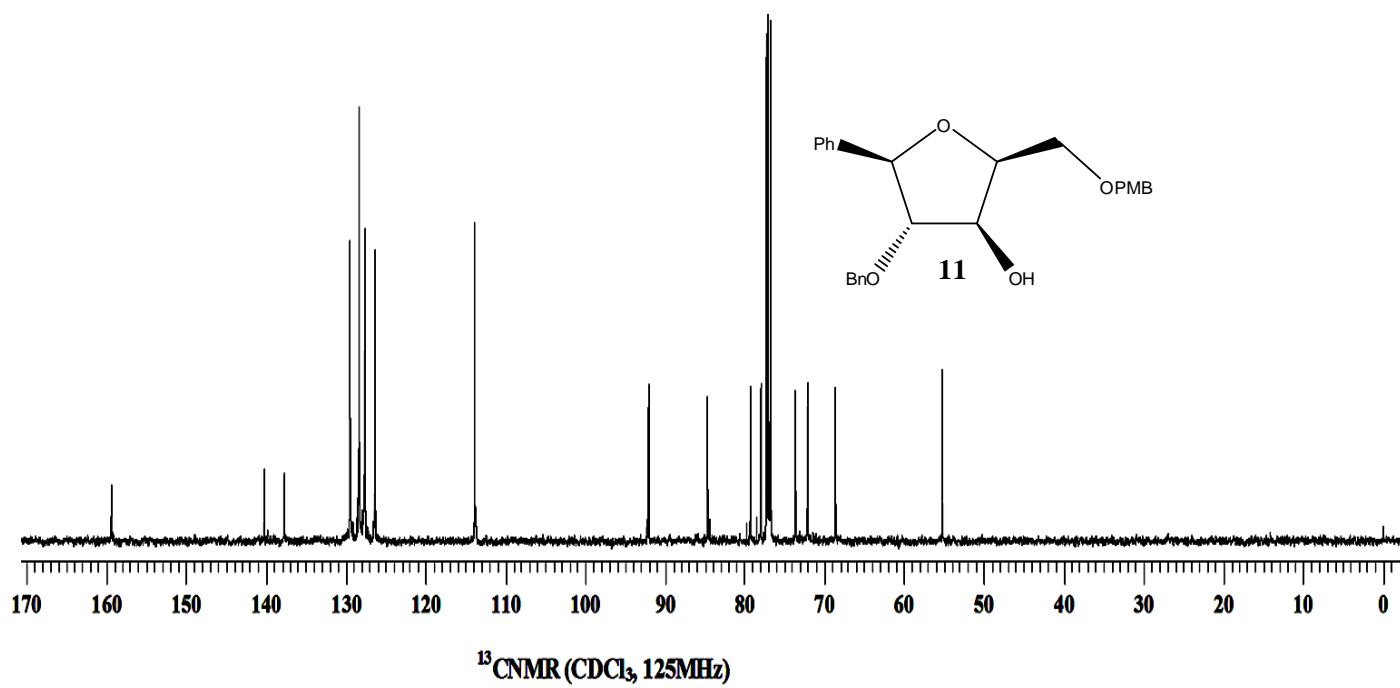

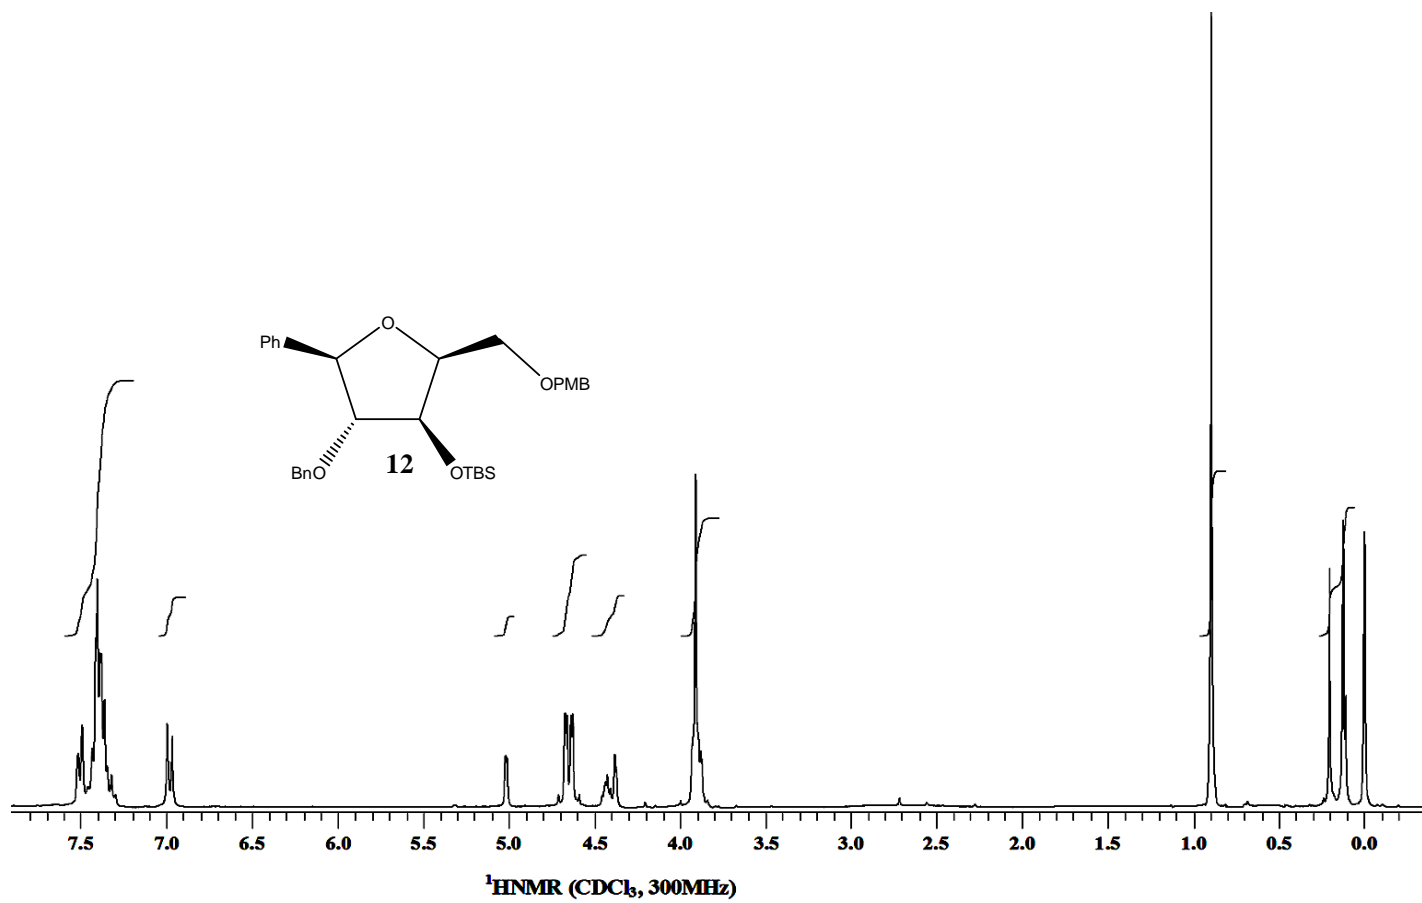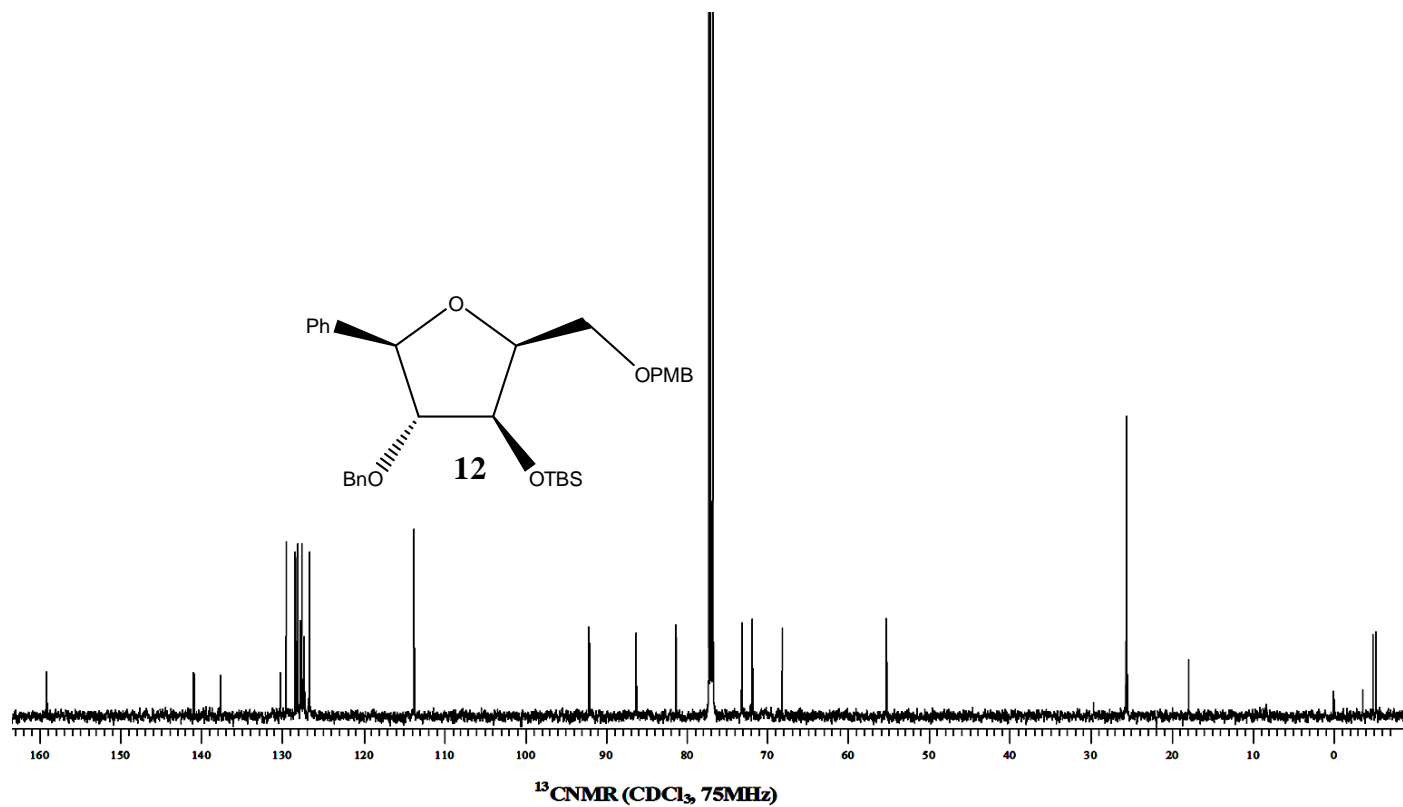



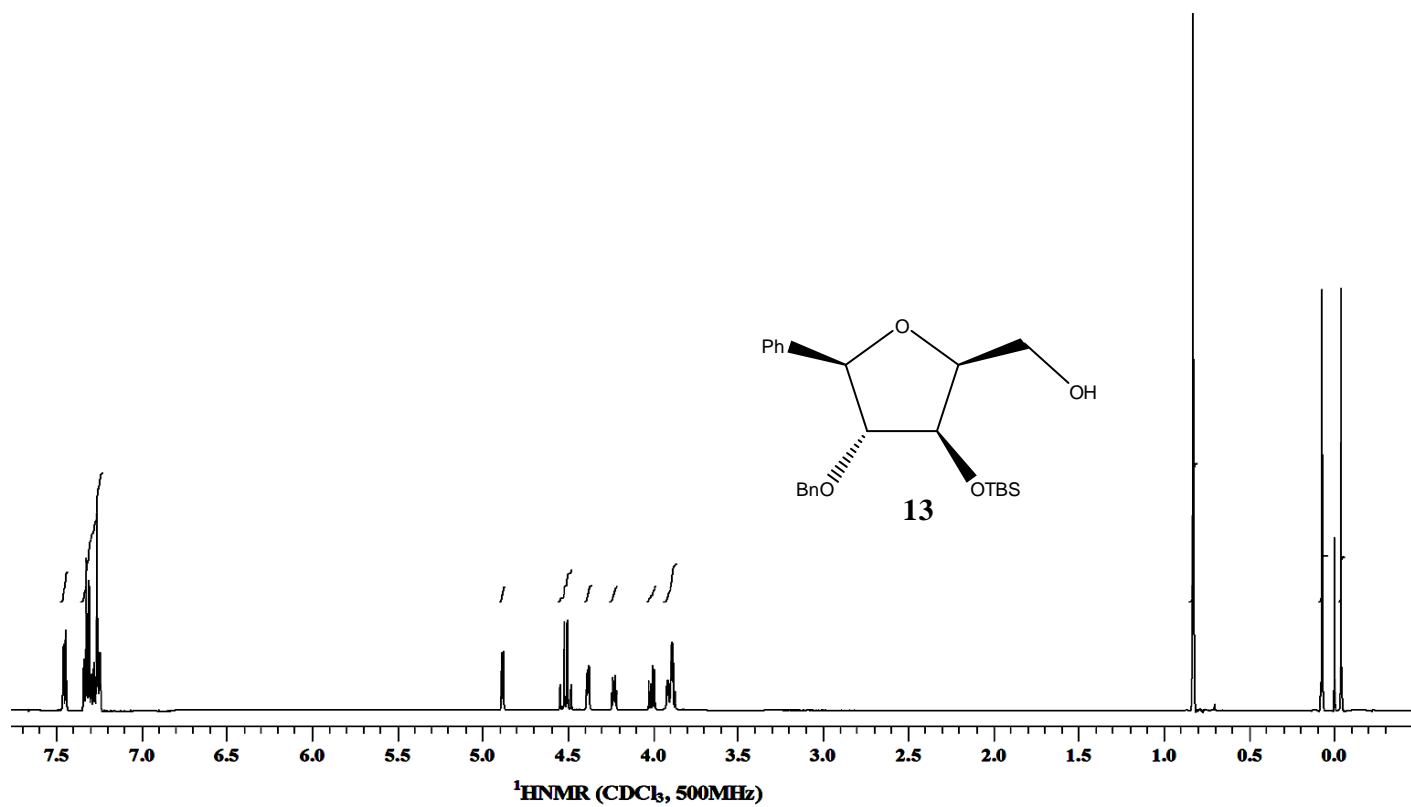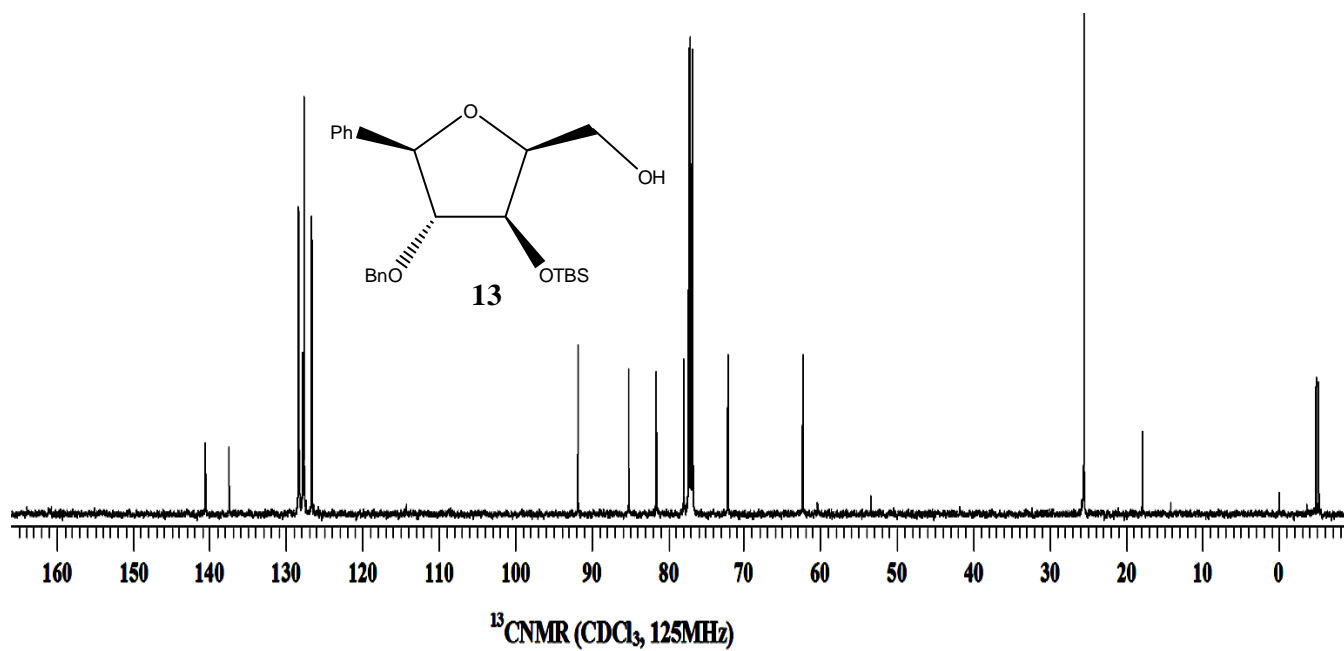

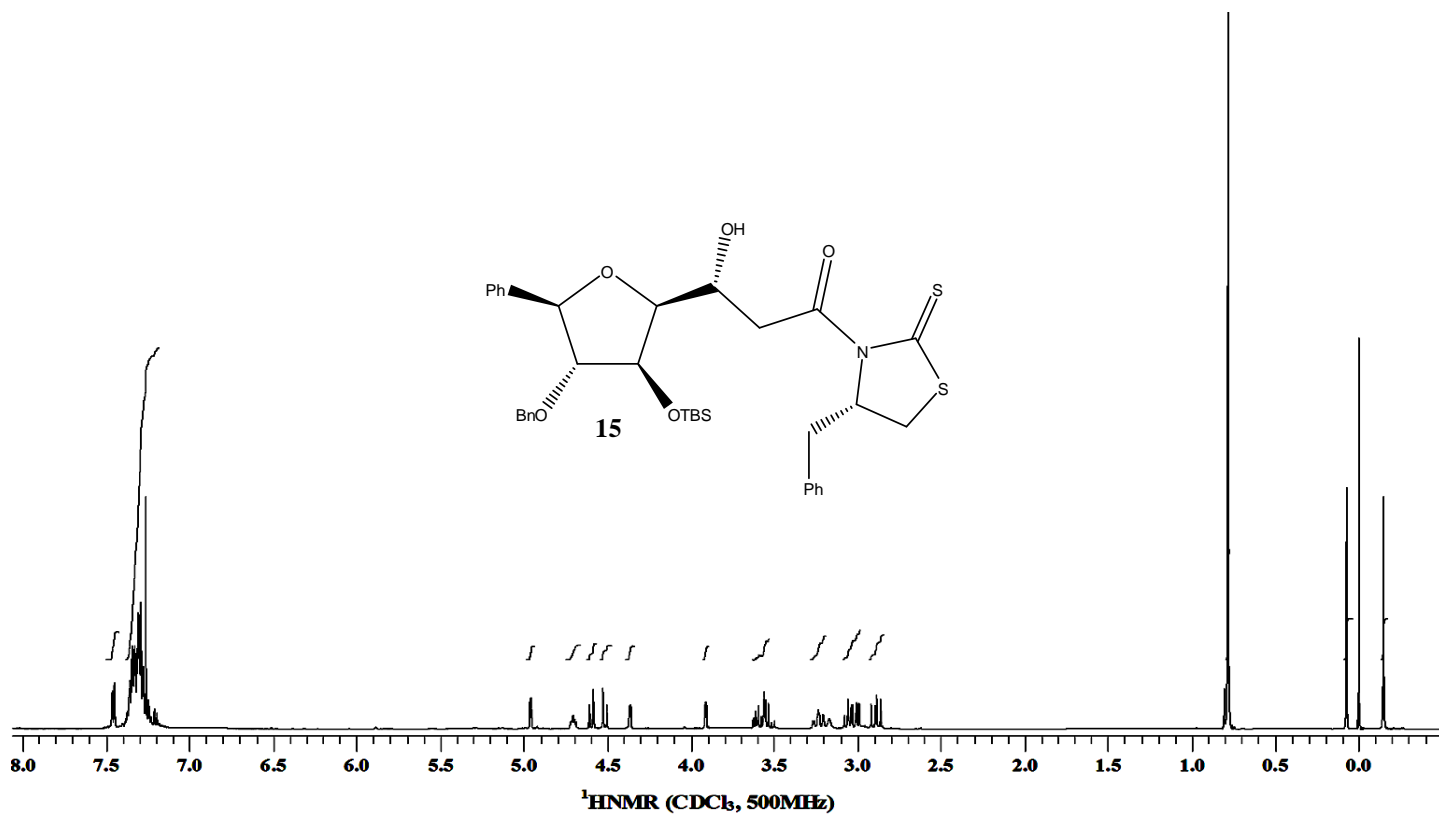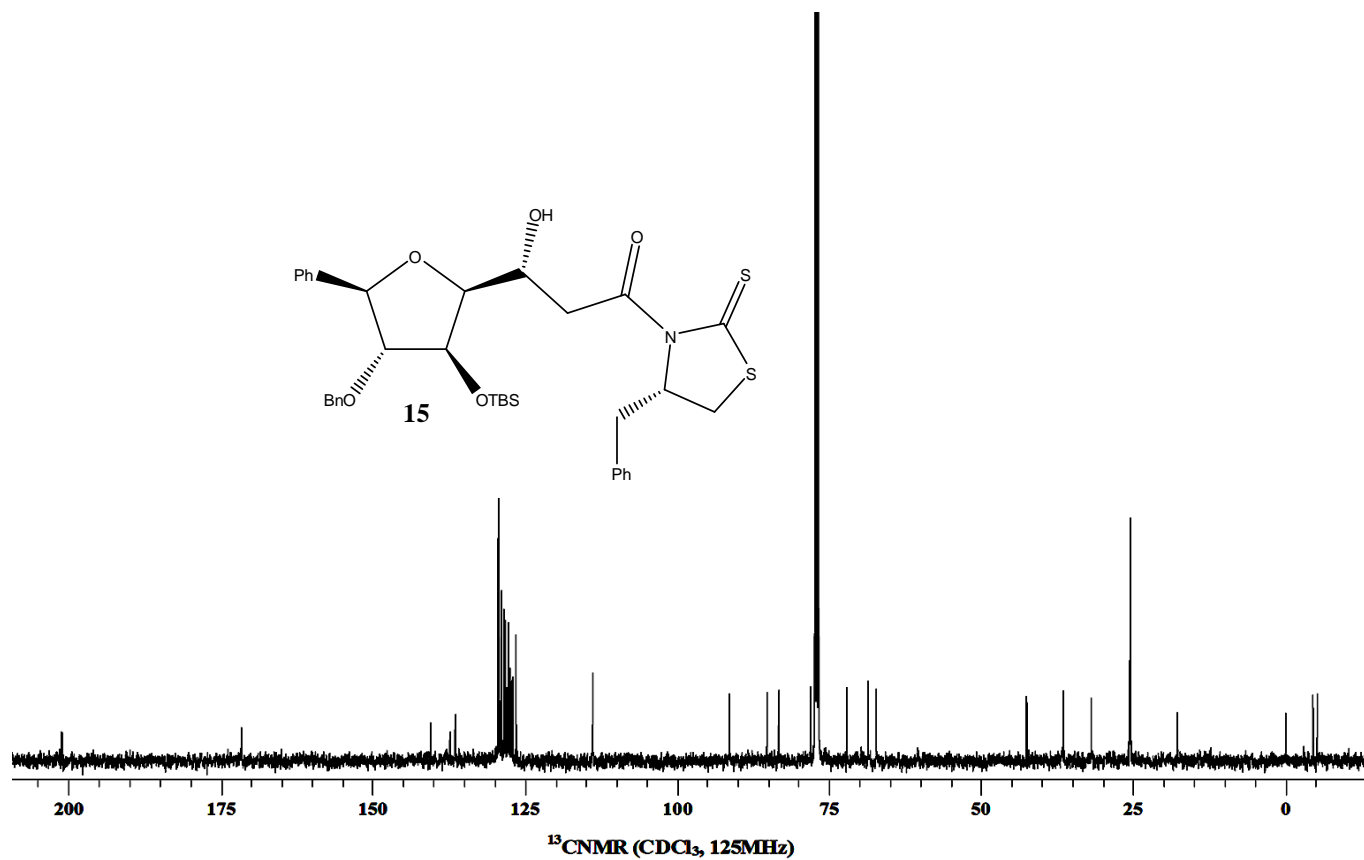

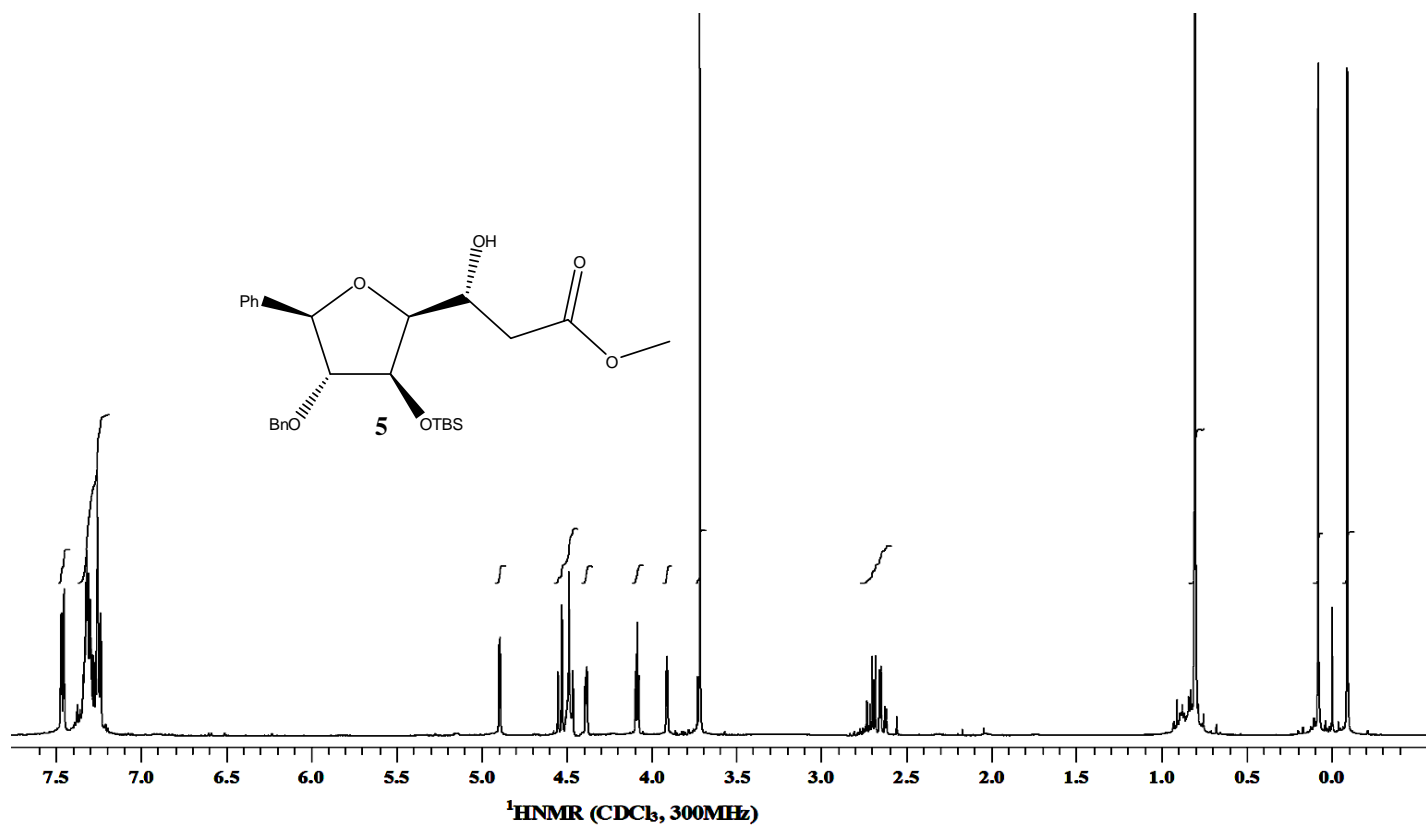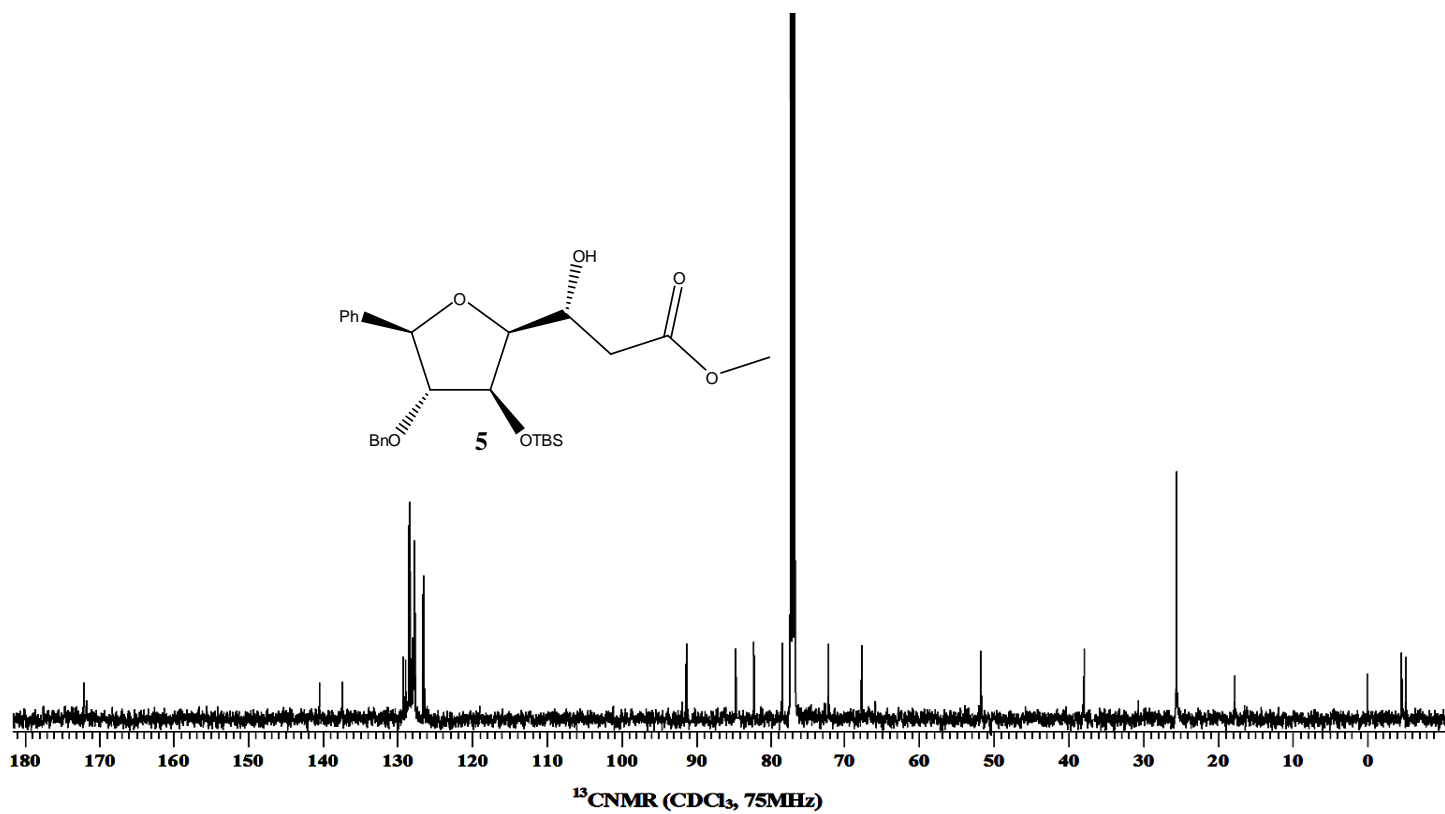

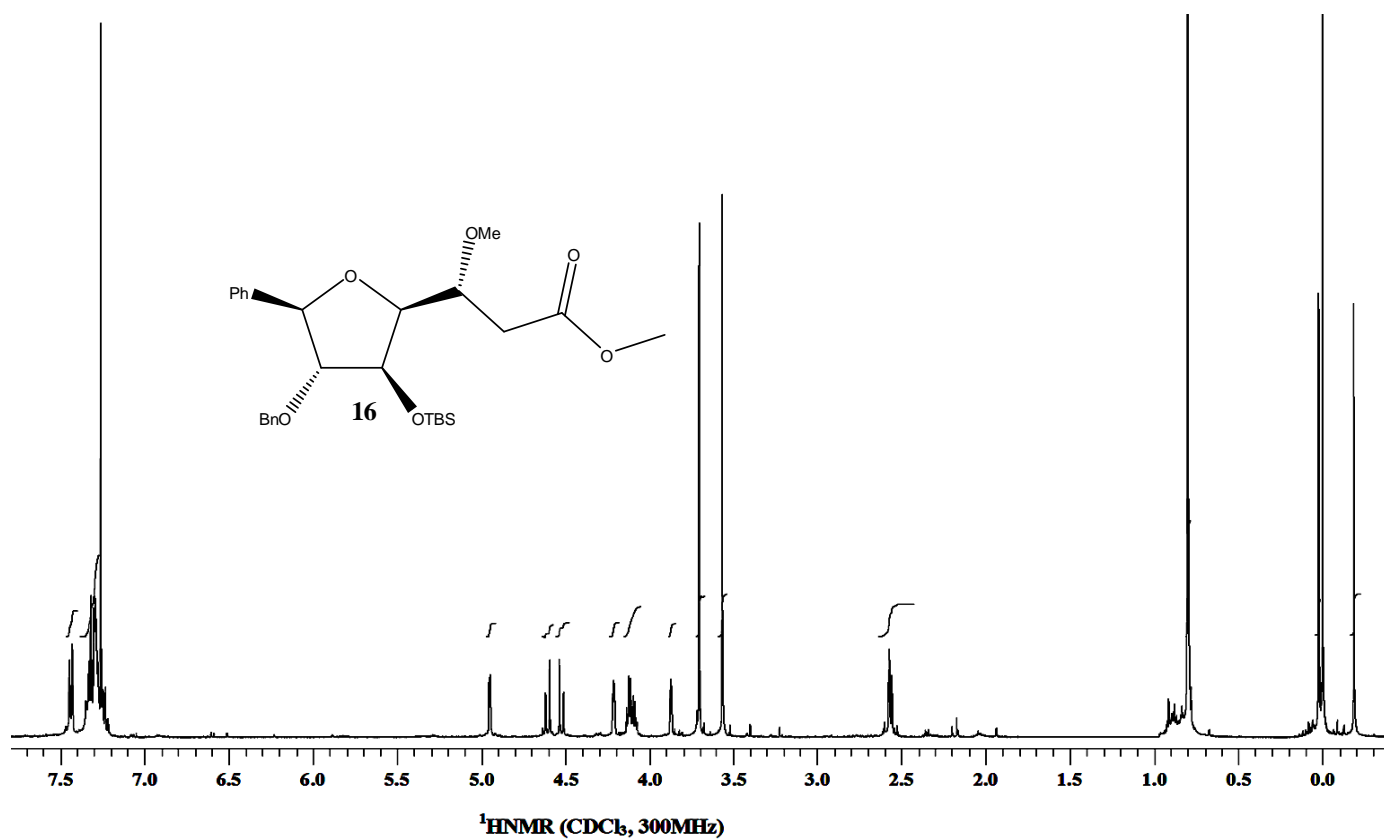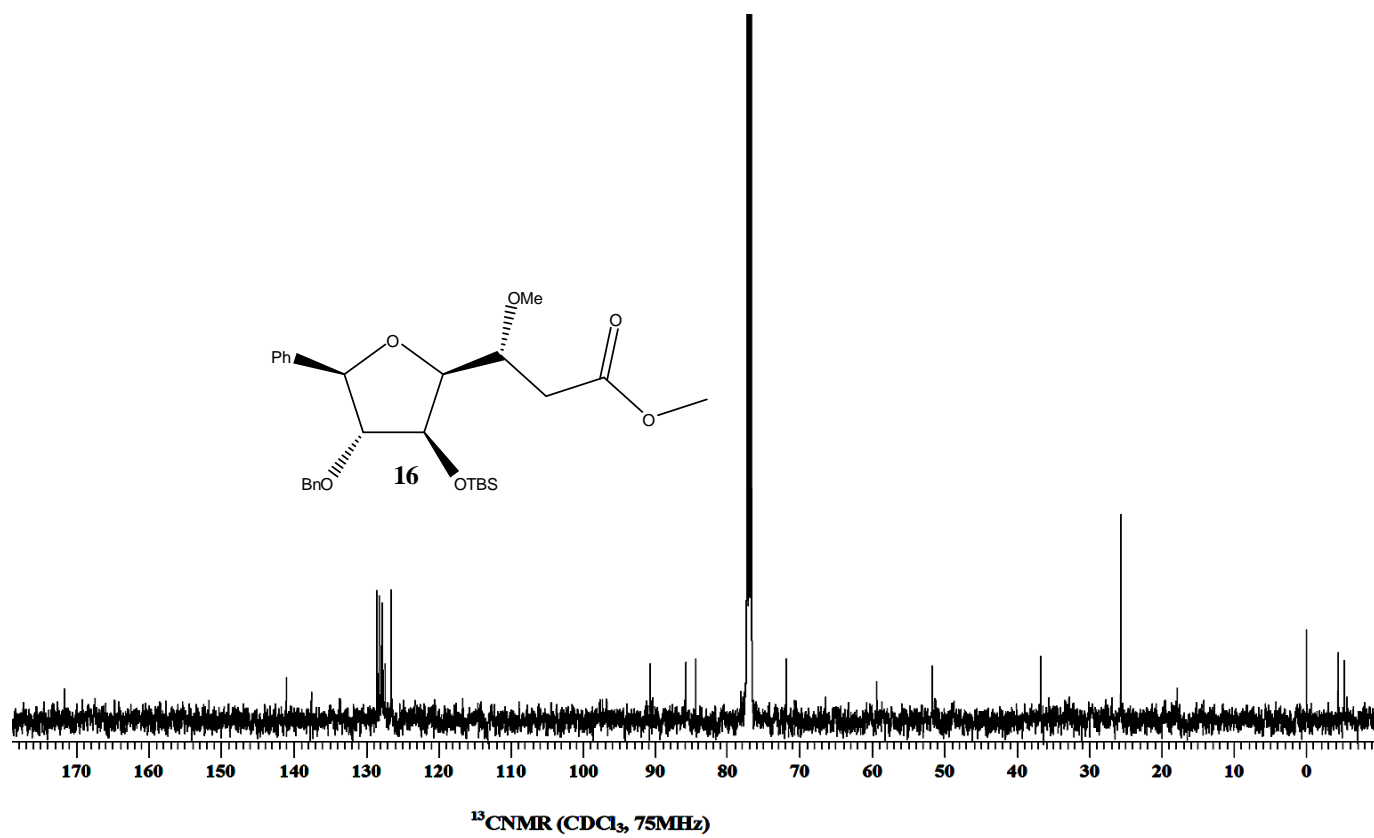

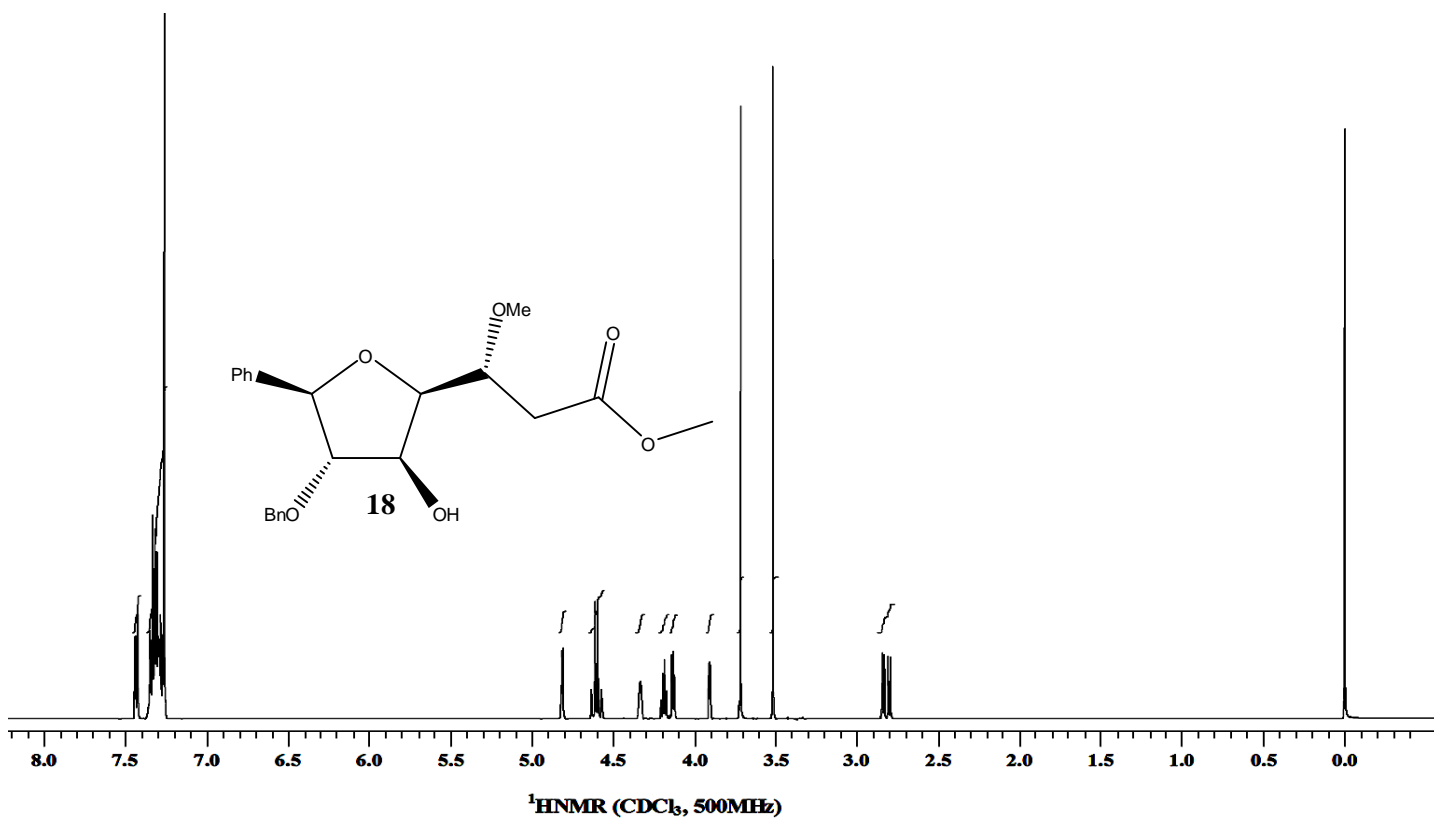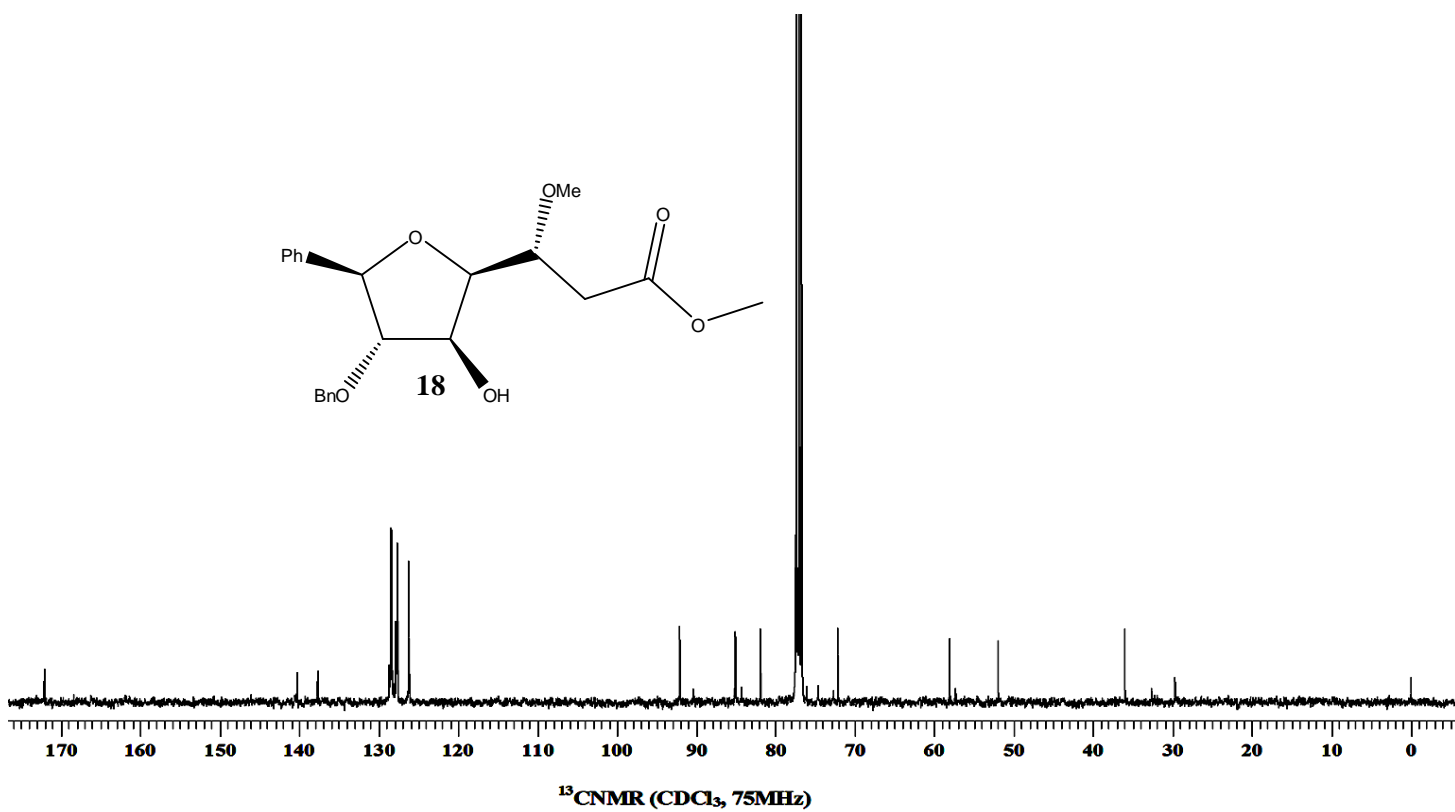

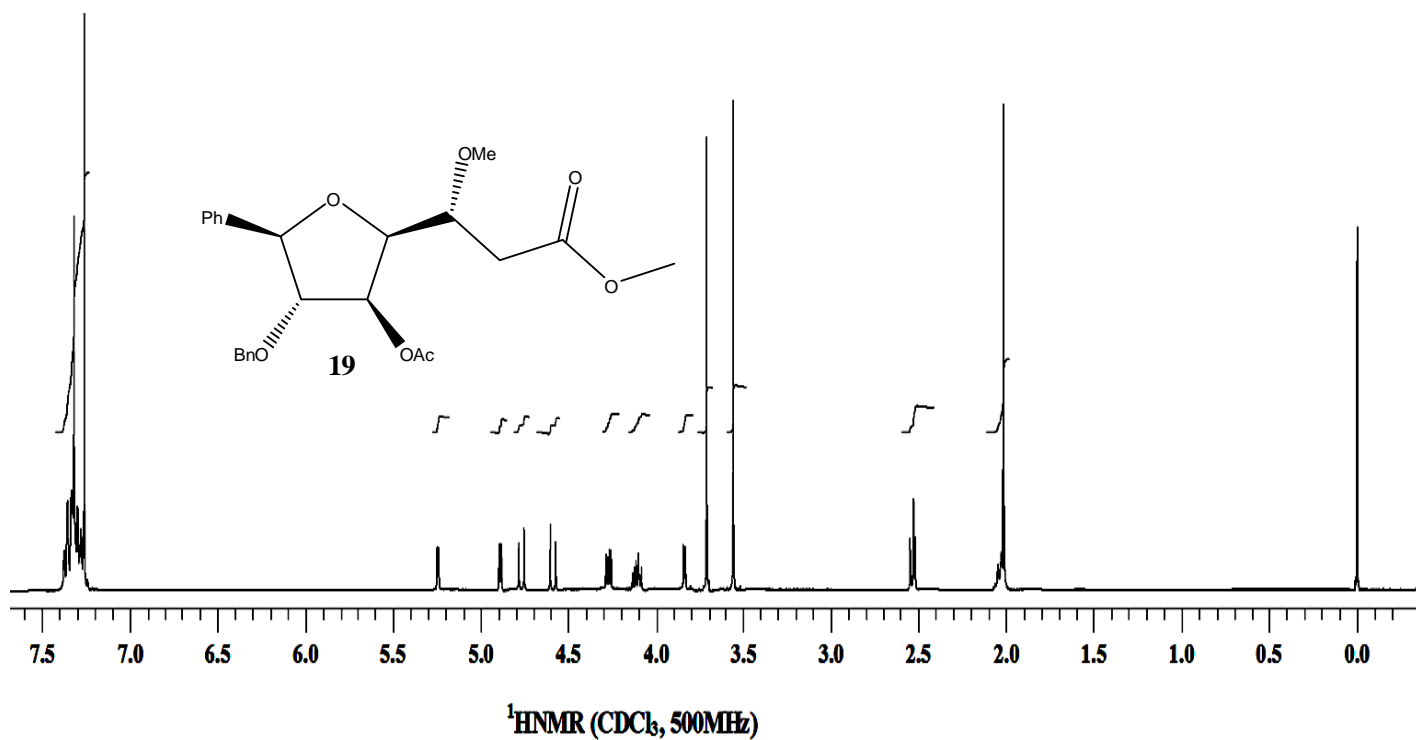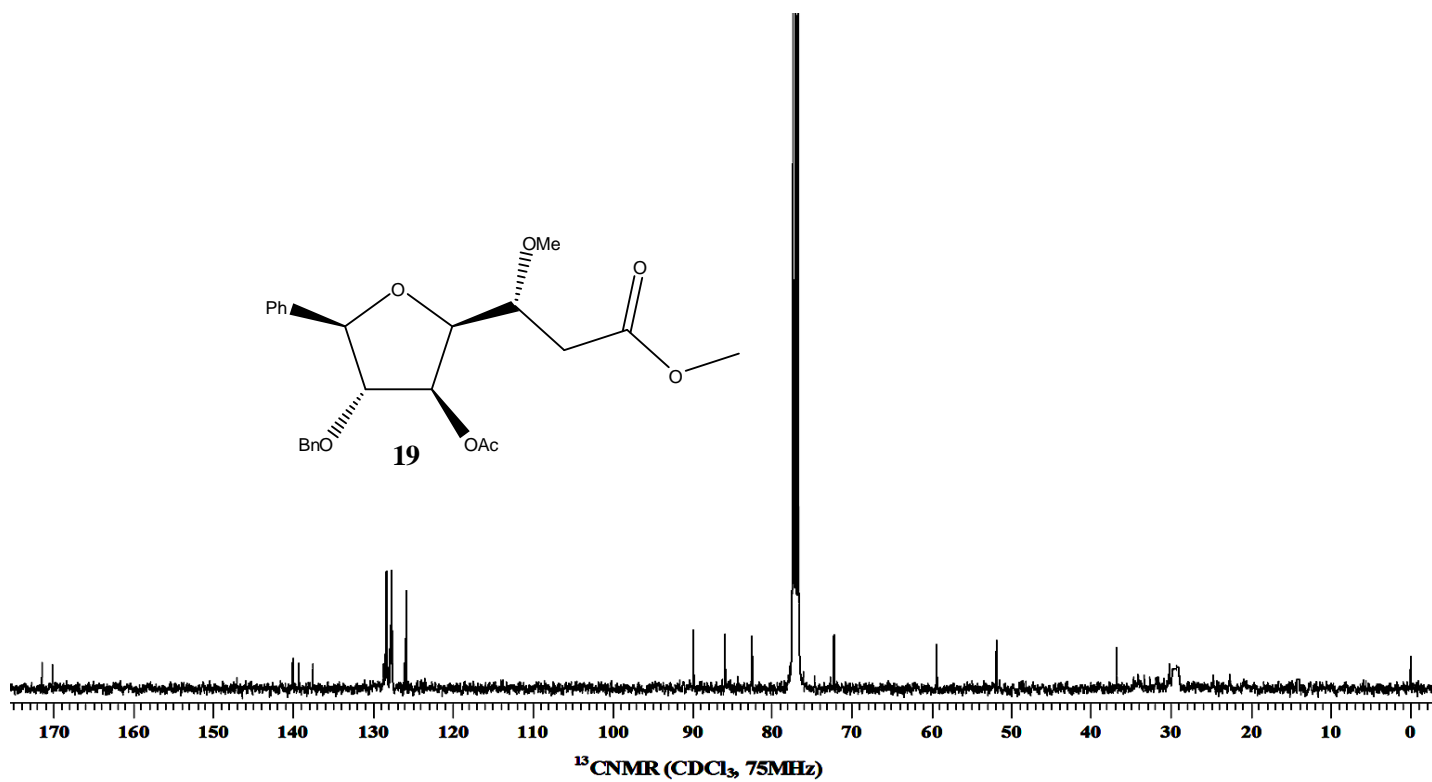

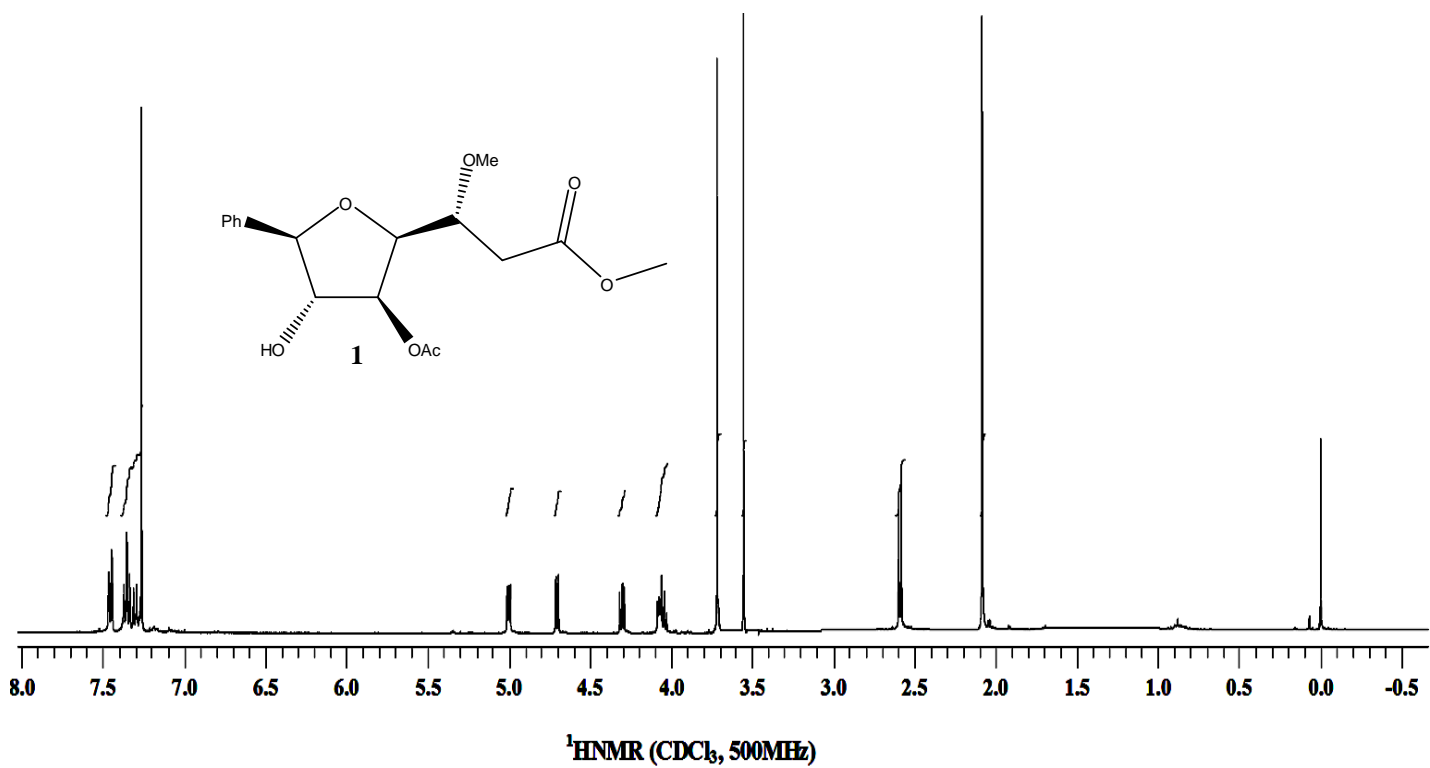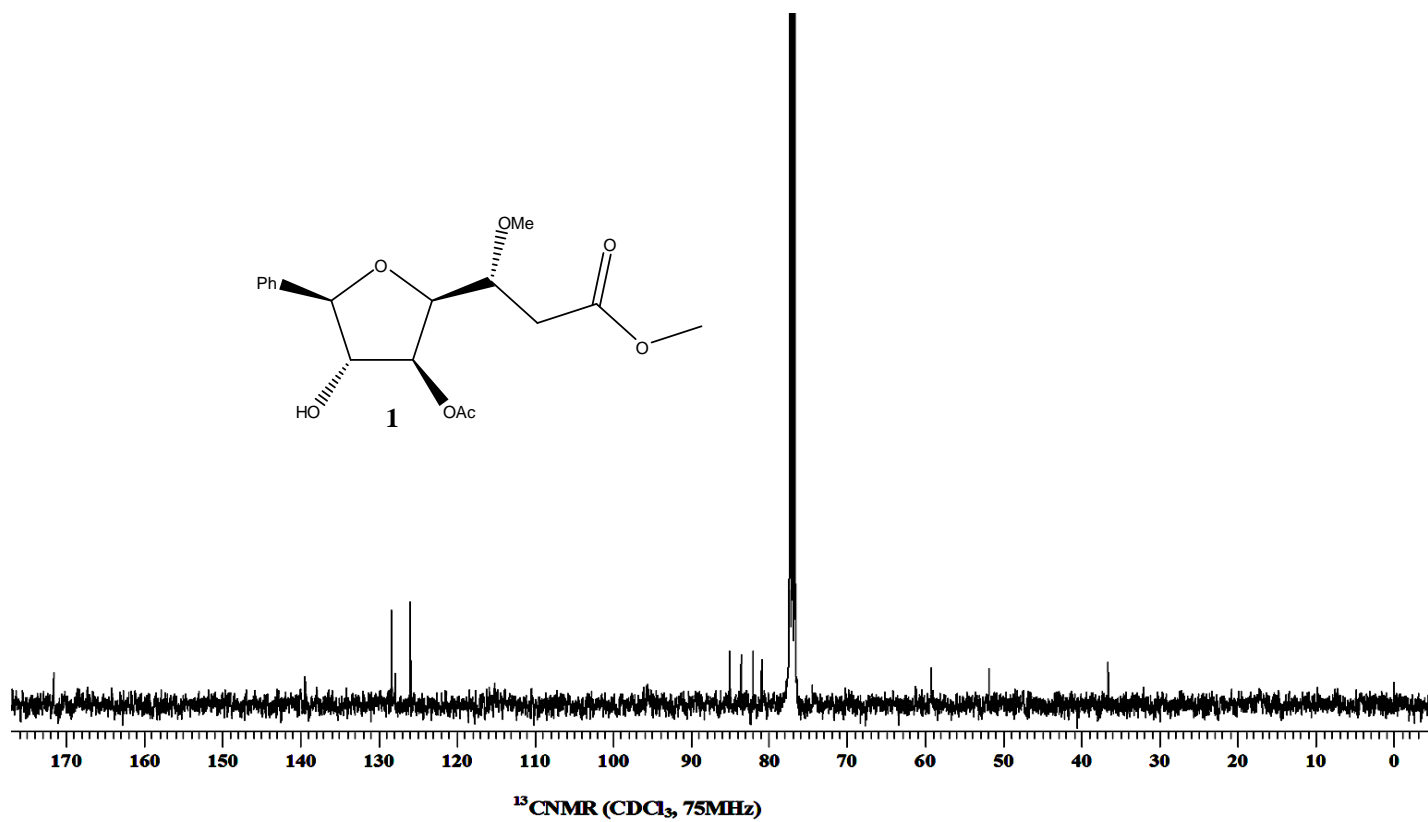

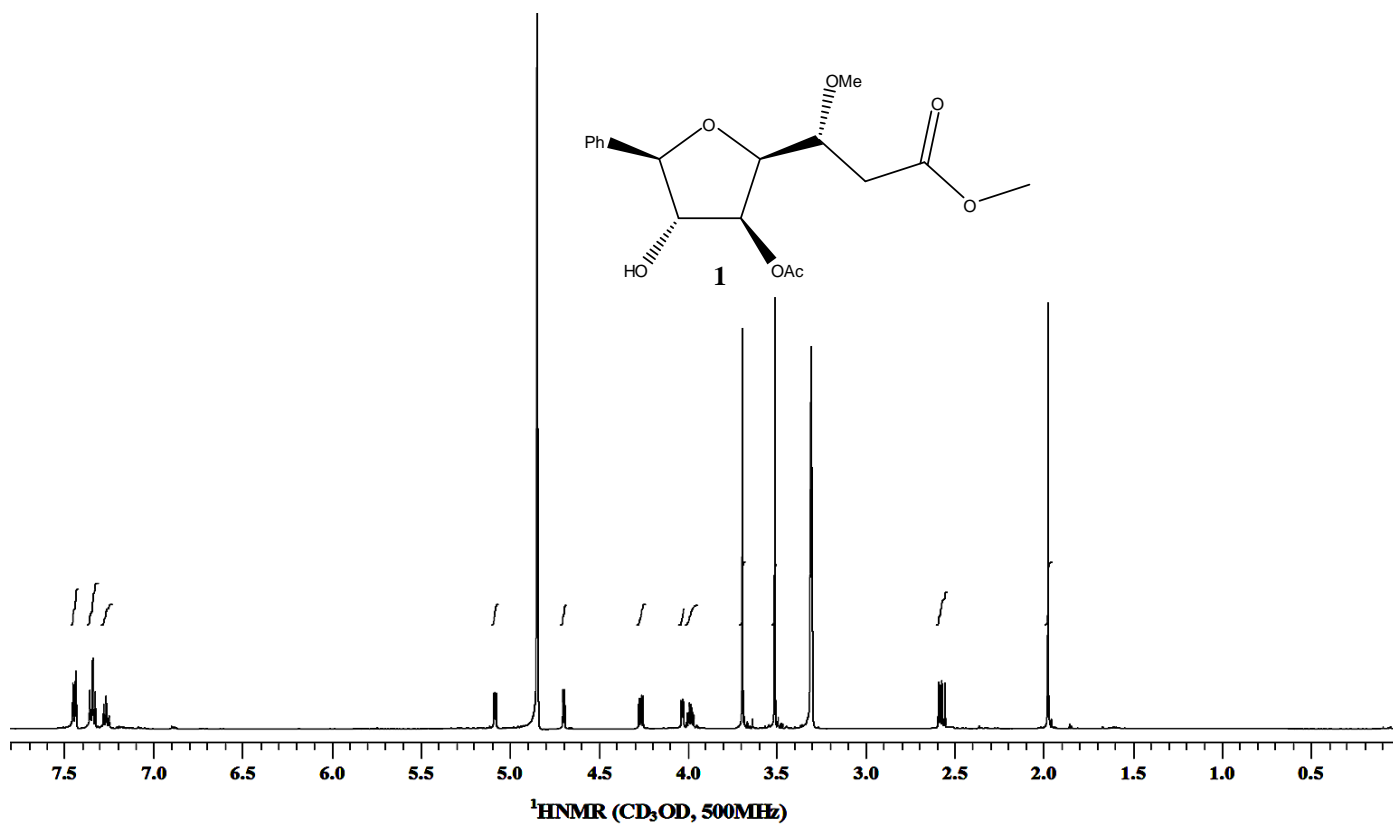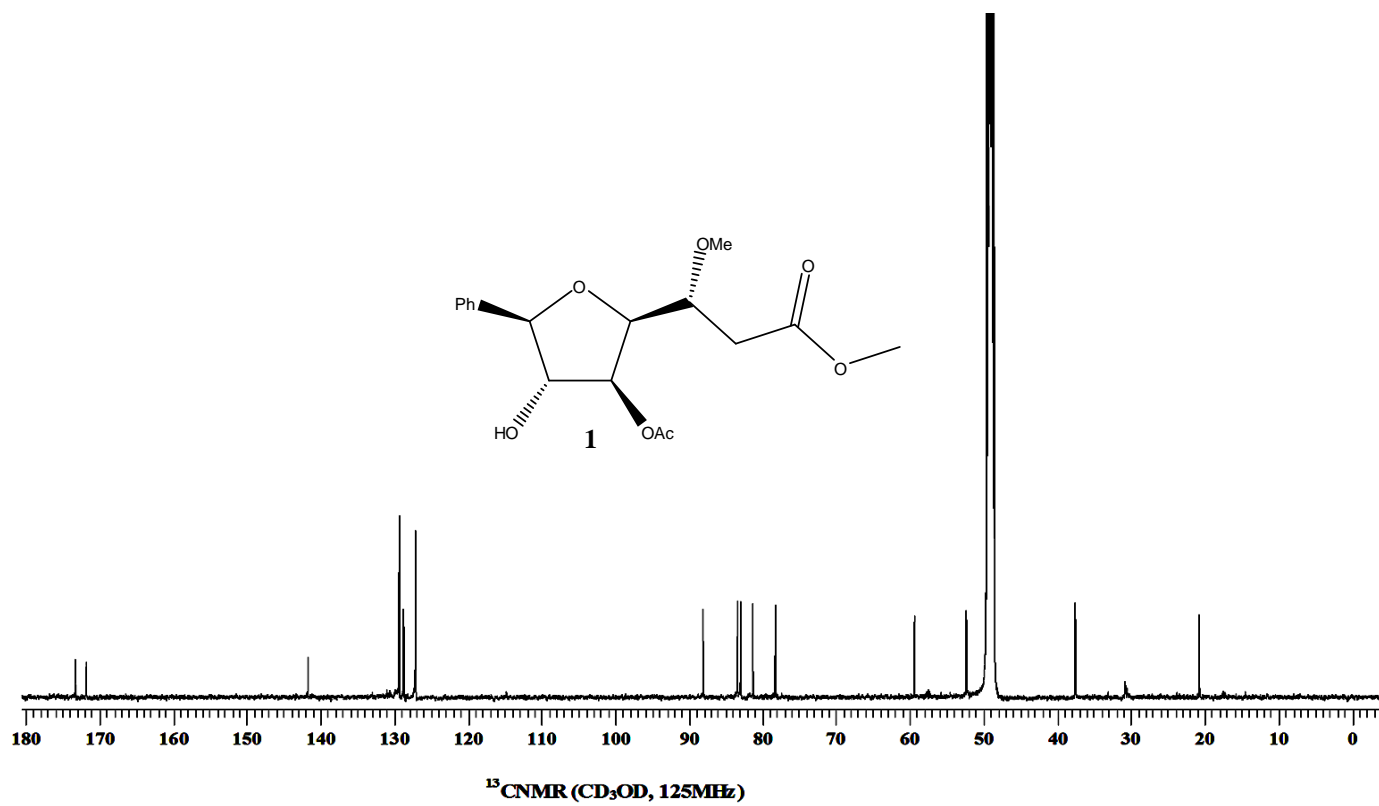



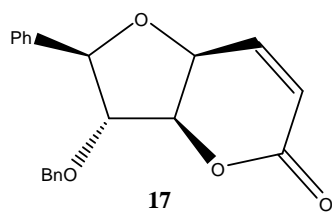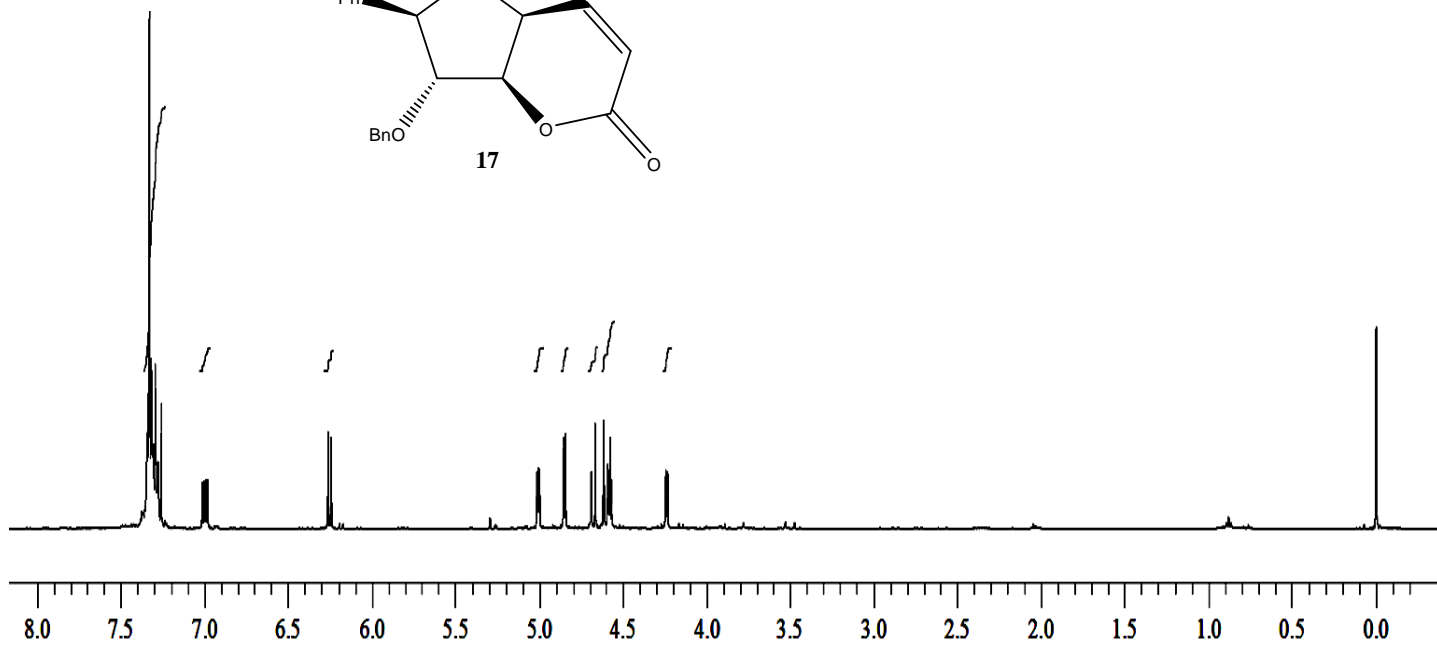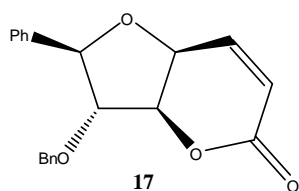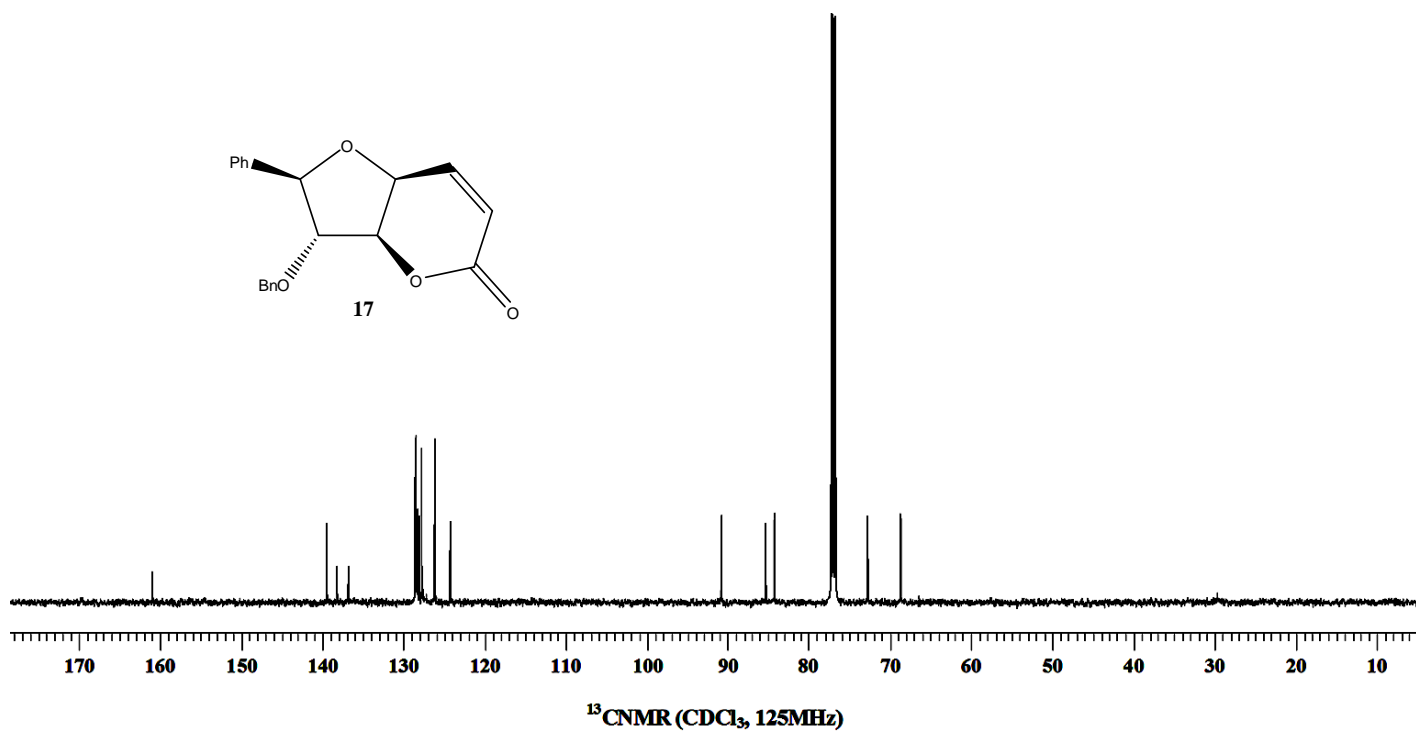

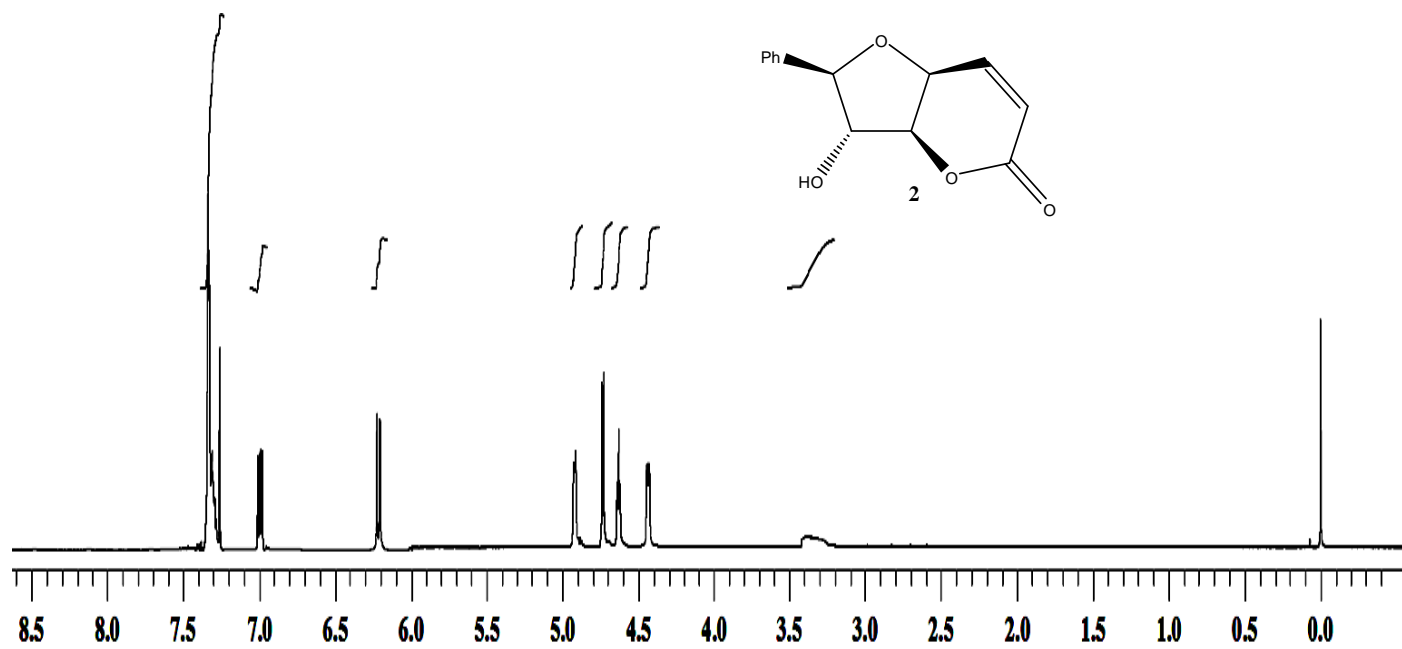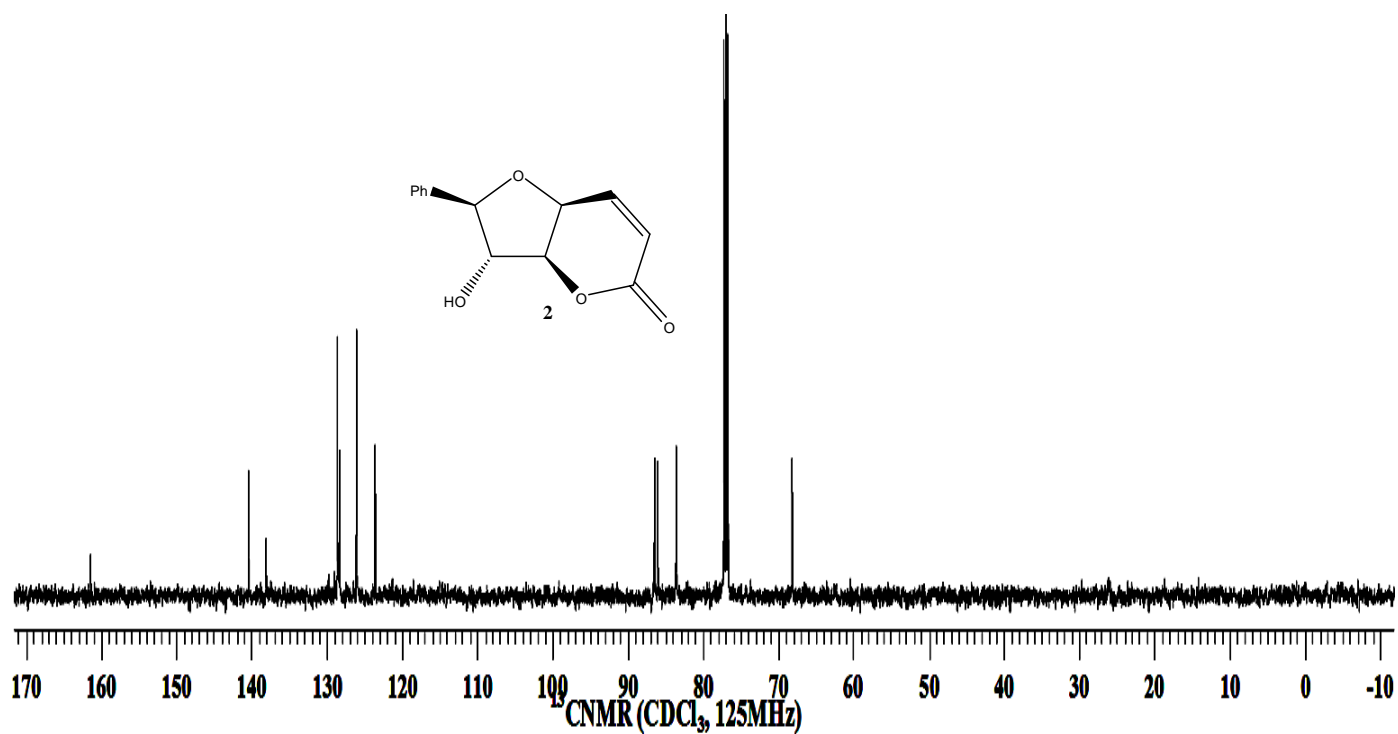

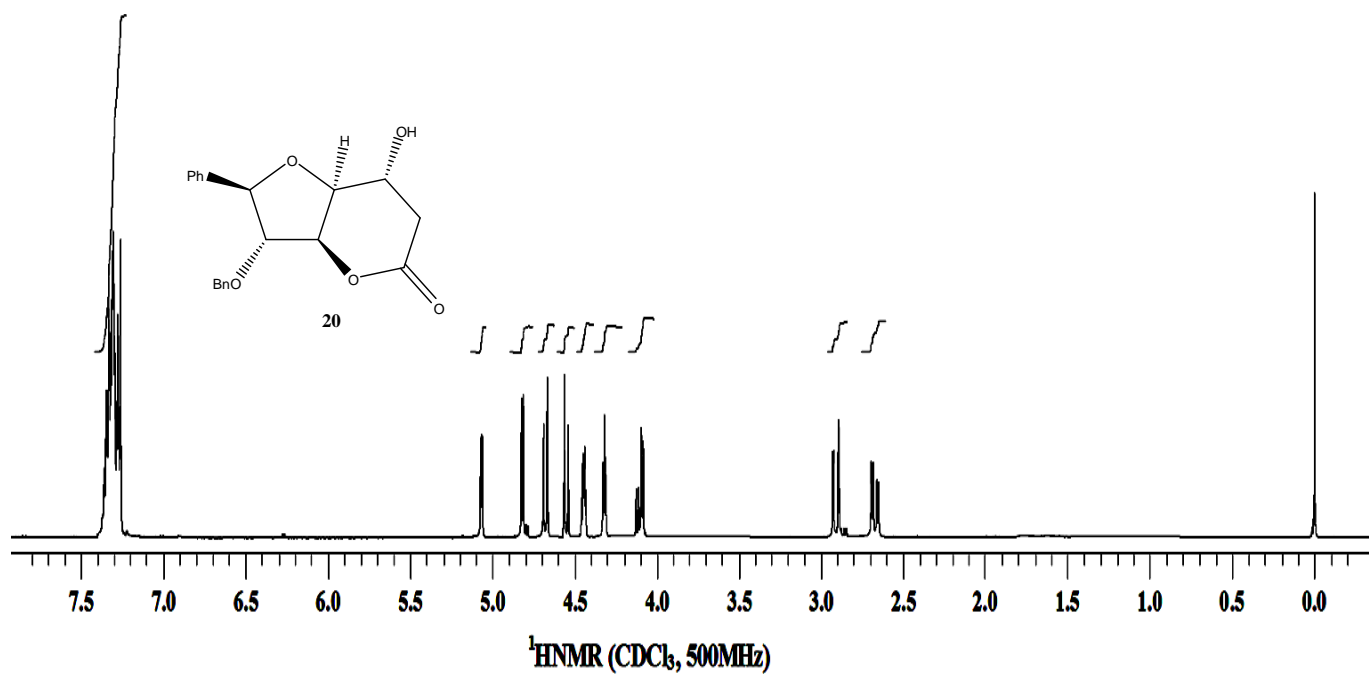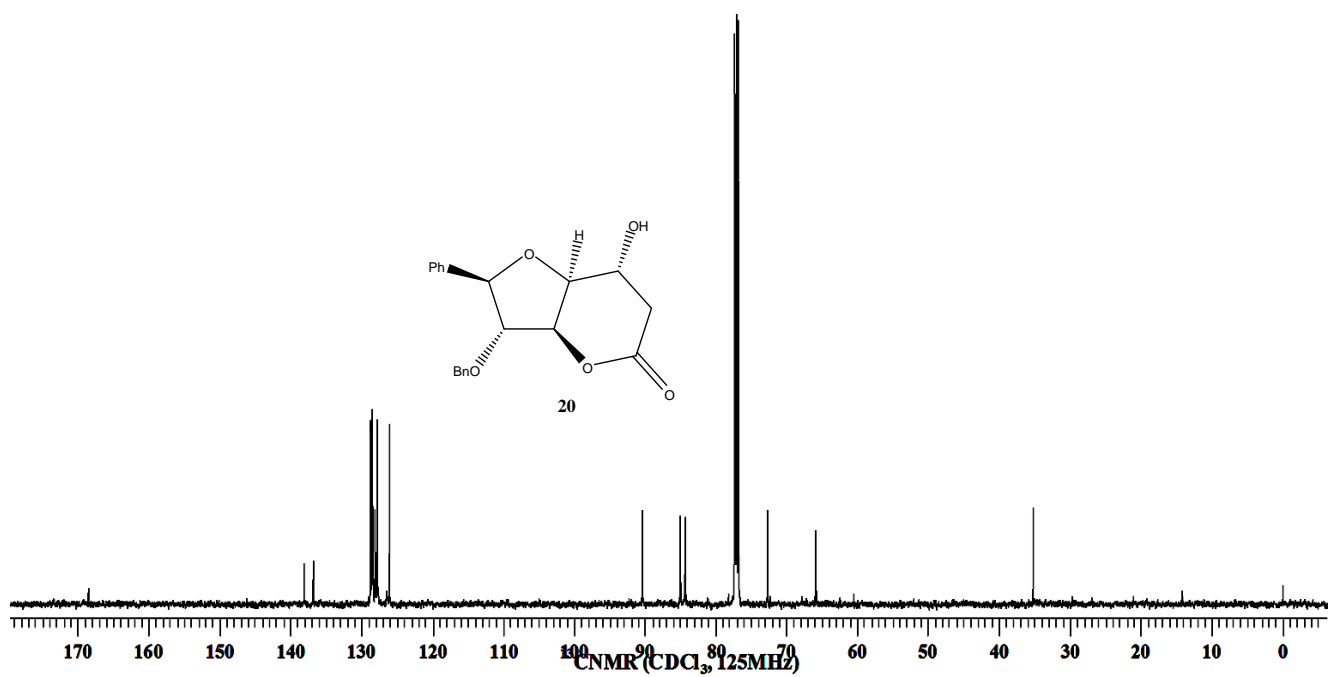

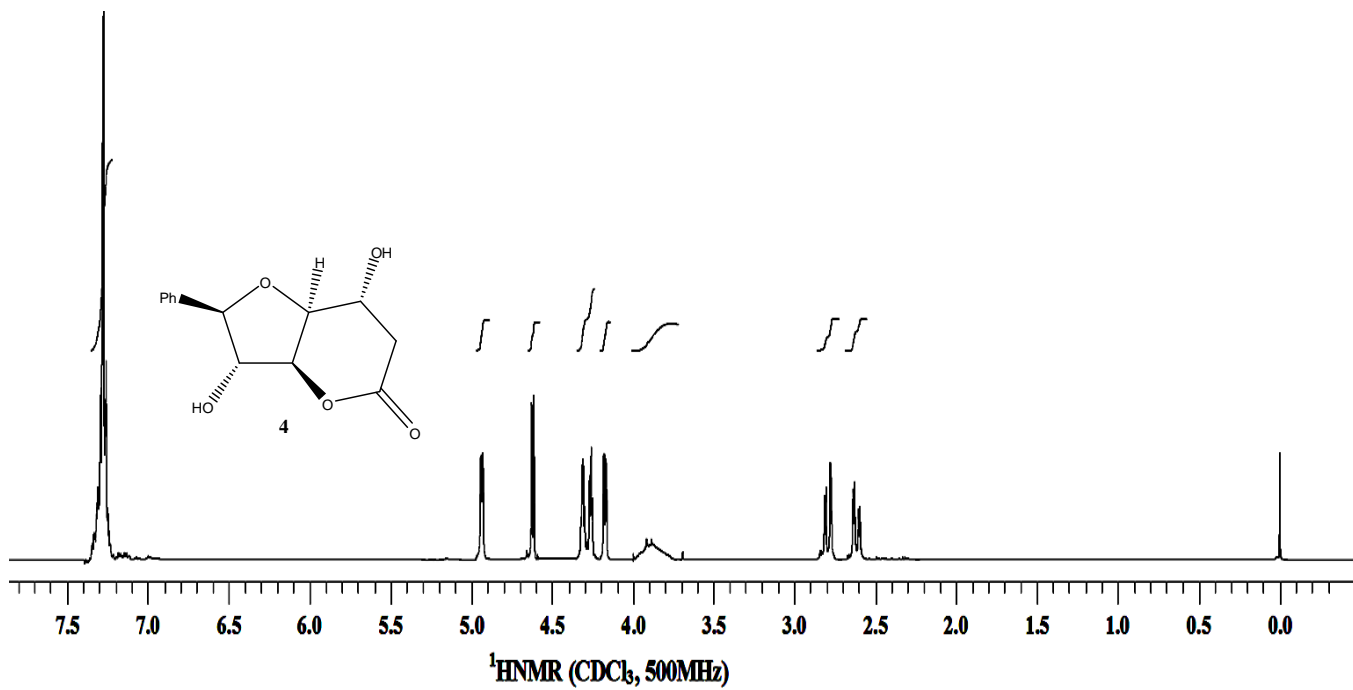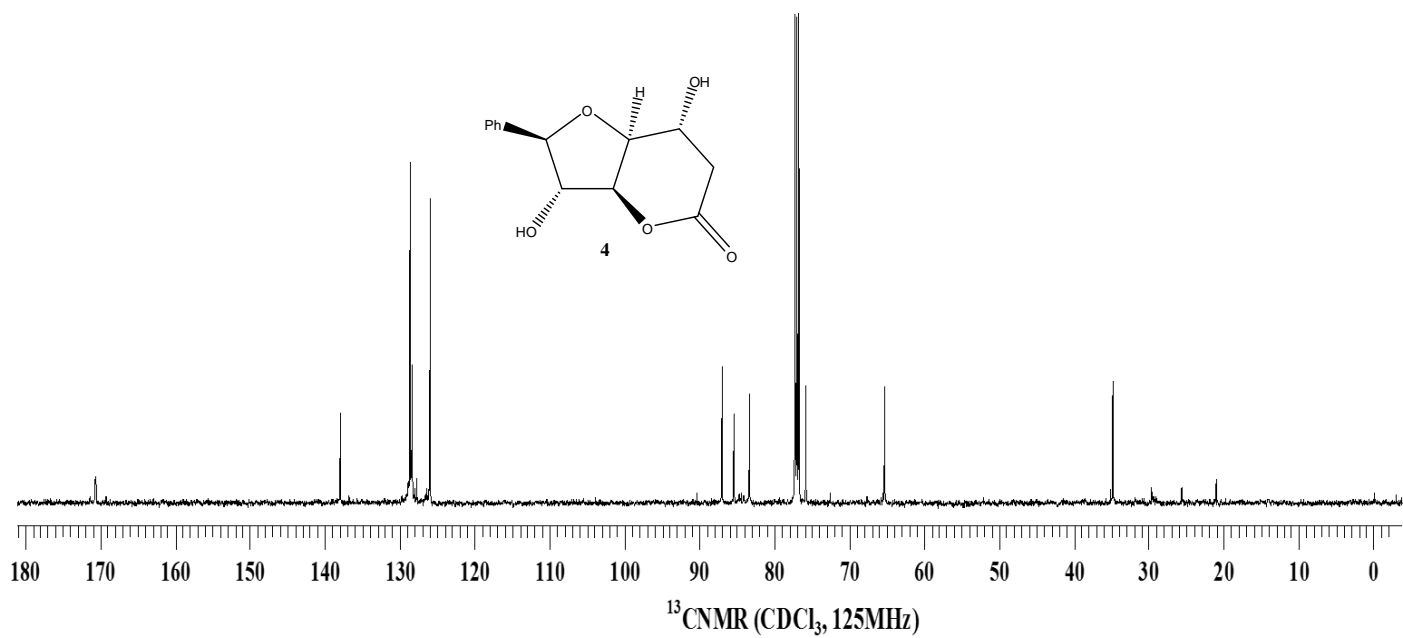

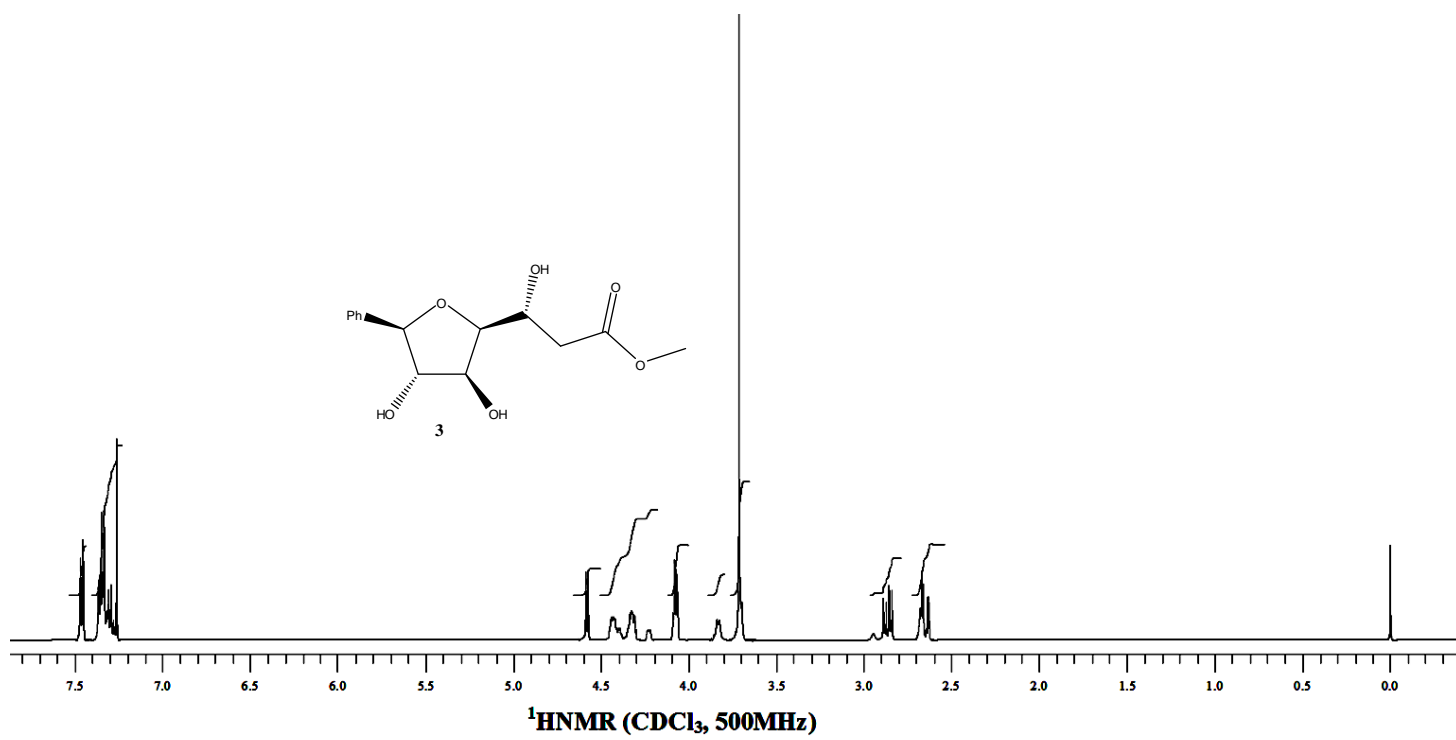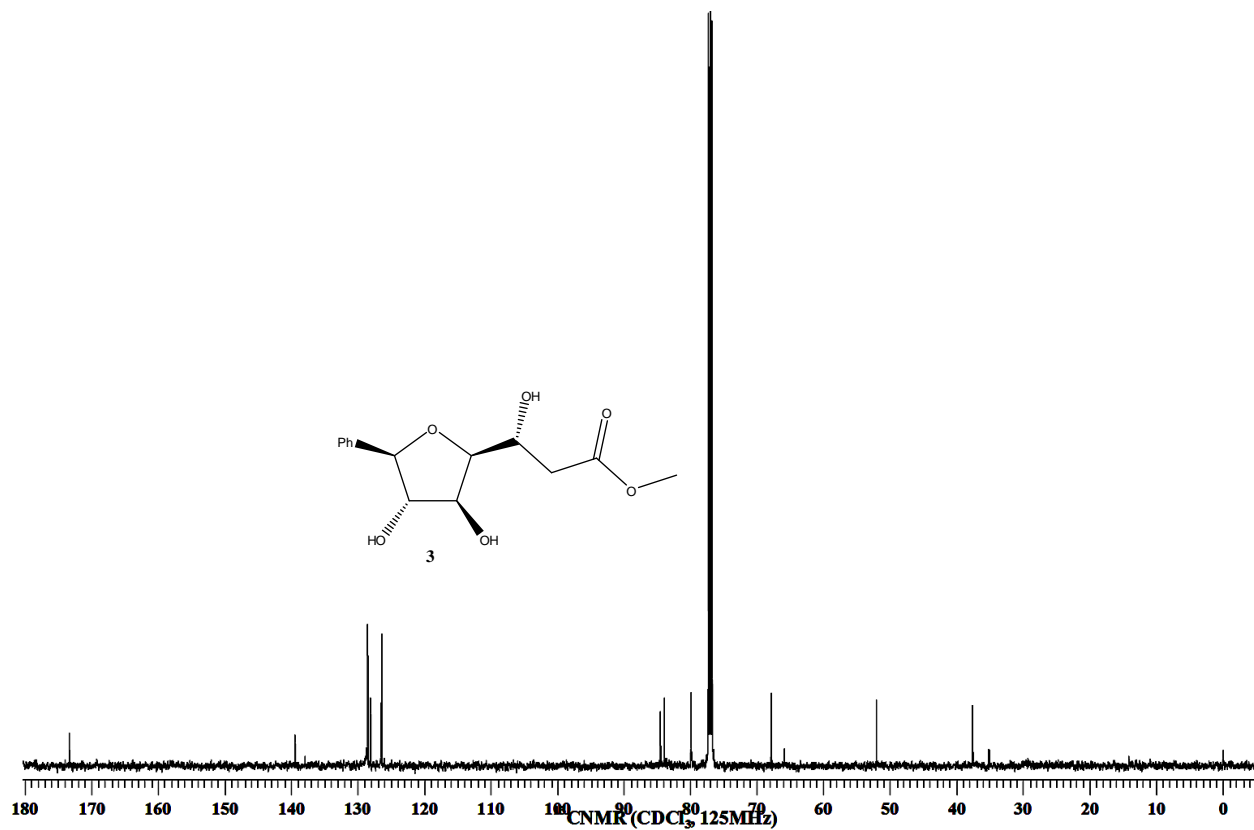

Supplement: c5ob01598g1.pdf [file c5ob01598g1.pdf]
